# Supplementary material for: Reliability and validity of the Japanese version of the Ocular Surface Disease Index for dry eye disease
Source: PubMed Central journal article supplement — BMJ Open. 2019 Nov 25;9(11):e033940. doi: 10.1136/bmjopen-2019-033940 (PMC6886996; doi:10.1136/bmjopen-2019-033940), 2019-11-25
Supplement: bmjopen-2019-033940.draft_revisions.pdf [file bmjopen-2019-033940.draft_revisions.pdf]

# BMJ Open

BMJ Open is committed to open peer review. As part of this commitment we make the peer review history of every article we publish publicly available.

When an article is published we post the peer reviewers' comments and the authors' responses online. We also post the versions of the paper that were used during peer review. These are the versions that the peer review comments apply to.

The versions of the paper that follow are the versions that were submitted during the peer review process. They are not the versions of record or the final published versions. They should not be cited or distributed as the published version of this manuscript.

BMJ Open is an open access journal and the full, final, typeset and author-corrected version of record of the manuscript is available on our site with no access controls, subscription charges or pay-per-view fees (<http://bmjopen.bmj.com>).

If you have any questions on BMJ Open's open peer review process please email [info.bmjopen@bmj.com](mailto:info.bmjopen@bmj.com)

# BMJ Open

## Reliability and Validity of the Japanese Version of the Ocular Surface Disease Index for Dry Eye Disease

|                               |                                                                                                                                                                                                                                                                                                                                                                                                                                                                                                                                                                                                                                                                                                                                                                                                                                                                                                                                                                                                                                                                                                                                                                                                                                                                                                    |
|-------------------------------|----------------------------------------------------------------------------------------------------------------------------------------------------------------------------------------------------------------------------------------------------------------------------------------------------------------------------------------------------------------------------------------------------------------------------------------------------------------------------------------------------------------------------------------------------------------------------------------------------------------------------------------------------------------------------------------------------------------------------------------------------------------------------------------------------------------------------------------------------------------------------------------------------------------------------------------------------------------------------------------------------------------------------------------------------------------------------------------------------------------------------------------------------------------------------------------------------------------------------------------------------------------------------------------------------|
| Journal:                      | <i>BMJ Open</i>                                                                                                                                                                                                                                                                                                                                                                                                                                                                                                                                                                                                                                                                                                                                                                                                                                                                                                                                                                                                                                                                                                                                                                                                                                                                                    |
| Manuscript ID                 | bmjopen-2019-033940                                                                                                                                                                                                                                                                                                                                                                                                                                                                                                                                                                                                                                                                                                                                                                                                                                                                                                                                                                                                                                                                                                                                                                                                                                                                                |
| Article Type:                 | Original research                                                                                                                                                                                                                                                                                                                                                                                                                                                                                                                                                                                                                                                                                                                                                                                                                                                                                                                                                                                                                                                                                                                                                                                                                                                                                  |
| Date Submitted by the Author: | 29-Aug-2019                                                                                                                                                                                                                                                                                                                                                                                                                                                                                                                                                                                                                                                                                                                                                                                                                                                                                                                                                                                                                                                                                                                                                                                                                                                                                        |
| Complete List of Authors:     | <p>Midorikawa-Inomata, Akie; Juntendo University Graduate School of Medicine, Department of Hospital Administration<br/> Inomata, Takenori; Juntendo University Faculty of Medicine, Ophthalmology<br/> Nojiri, Shuko ; Juntendo University, Clinical Research Support Center<br/> Nakamura, Masahiro; Graduate School of Bioengineering, The University of Tokyo, Precision Health, Department of Bioengineering<br/> Iwagami, Masao; University of Tsukuba, Department of Health Services Research<br/> Keiichi, Fujimoto; Juntendo University Graduate School of Medicine, Department of Ophthalmology<br/> Okumura, Yuichi; Juntendo University Graduate School of Medicine, Department of Ophthalmology<br/> Iwata, Nanami; Juntendo University Graduate School of Medicine, Department of Ophthalmology<br/> Eguchi, Atsuko; Juntendo University Graduate School of Medicine, Department of Hospital Administration<br/> Hasegawa, Hitomi; Juntendo University Faculty of Medicine, Ophthalmology<br/> Kinouchi, Hikaru; Aoyama Gakuin University, School of Cultural and Creative Studies<br/> Murakami, Akira; Juntendo University Faculty of Medicine, Ophthalmology<br/> Kobayashi, Hiroyuki; Juntendo University Graduate School of Medicine, Department of Hospital Administration</p> |
| Keywords:                     | dry eye disease, ocular surface disease index, OSDI, reliability, validity                                                                                                                                                                                                                                                                                                                                                                                                                                                                                                                                                                                                                                                                                                                                                                                                                                                                                                                                                                                                                                                                                                                                                                                                                         |
|                               |                                                                                                                                                                                                                                                                                                                                                                                                                                                                                                                                                                                                                                                                                                                                                                                                                                                                                                                                                                                                                                                                                                                                                                                                                                                                                                    |

SCHOLARONE™  
Manuscripts

1  
2  
3  
4  
5 1 Original article—Clinical Science  
6 2

7 3 **Reliability and Validity of the Japanese Version of the**  
8 **Ocular Surface Disease Index for Dry Eye Disease**  
9 4  
10 5

11 6 **Akie Midorikawa-Inomata<sup>1</sup> RN, MPH, Takenori Inomata<sup>2,3,\*</sup> MD, PhD, MBA, Shuko**  
12 **Nojiri<sup>4</sup> MPH, PhD, Masahiro Nakamura<sup>5</sup> MD, PhD, Masao Iwagami<sup>6</sup> MD, MPH, MSc,**  
13 **PhD, Keiichi Fujimoto<sup>7</sup> MD, Yuichi Okumura<sup>7</sup> MD, Nanami Iwata<sup>7</sup>, Atsuko Eguchi<sup>1</sup>,**  
14 **Hitomi Hasegawa<sup>2</sup> MD, Hikaru Kinouchi<sup>8</sup>, Akira Murakami<sup>2,7,‡</sup> MD, PhD, and Hiroyuki**  
15 **Kobayashi<sup>1,‡</sup> MD, PhD.**  
16 9  
17 10

18  
19 11  
20 12 <sup>1</sup>Juntendo University Graduate School of Medicine, Department of Hospital Administration, Tokyo,  
21 13 Japan

22  
23 14 <sup>2</sup>Juntendo University Faculty of Medicine, Department of Ophthalmology, Tokyo, Japan

24  
25 15 <sup>3</sup>Juntendo University Faculty of Medicine, Department of Strategic Operating Room Management and  
26 16 Improvement, Tokyo, Japan

27  
28 17 <sup>4</sup>Juntendo University Faculty of Medicine, Department of Medical Technology Center, Tokyo, Japan

29  
30 18 <sup>5</sup>Precision Health, Department of Bioengineering, Graduate School of Bioengineering, The University of  
31 19 Tokyo, Tokyo, Japan

32  
33 20 <sup>6</sup>University of Tsukuba, Department of Health Services Research, Ibaraki, Japan

34  
35 21 <sup>7</sup>Juntendo University Graduate School of Medicine, Department of Ophthalmology, Tokyo, Japan

36  
37 22 <sup>8</sup>Aoyama Gakuin University, School of Cultural and Creative Studies, Tokyo, Japan

38  
39 23  
40 24 \*Corresponding author:

41  
42 25 Takenori Inomata, MD, PhD, MBA

43  
44 26 3-1-3 Hongo, Bunkyo-ku, Juntendo University Faculty of Medicine, Department of  
45 27 Ophthalmology, Tokyo, 113-0033, Japan.

46  
47 28 Tel: +81-3-3813-3111; Fax: +81-3-3817-0260, E-mail: tinoma@juntendo.ac.jp  
48 29

49  
50 30 ‡These authors are co-last authors.  
51 31

52  
53 32 **Word count: 3365**

54  
55 33 **Declaration of competing/conflicting interests:** There are no conflicts of interest to declare.

56  
57 34 **Funding sources:** This research received no external funding or any specific grant from  
58 35 funding agencies in the public, commercial, or not-for-profit sectors.

59  
60 36 **Data Availability Statement:** The data that support the findings of this study are available from  
37 the corresponding author upon reasonable request.

38

39 **ABSTRACT**

40 **Objectives:** The ocular surface disease index (OSDI) questionnaire is widely used to evaluate  
41 subjective symptoms of dry eye disease (DED) as a primary diagnostic criterion. This study  
42 aimed to develop a Japanese version of the OSDI (J-OSDI) and assess its reliability and  
43 validity.

44 **Design and Setting:** Hospital-based cross-sectional observational study.

45 **Participants:** A total of 209 patients recruited from the Department of Ophthalmology at  
46 Juntendo University Hospital.

47 **Methods:** We translated and culturally adapted the OSDI into Japanese. The J-OSDI was then  
48 assessed for internal consistency, reliability, and validity. We also evaluated the optimal cut-off  
49 value to suspect DED using an area under the receiver operating characteristic curve (AUC)  
50 analysis.

51 **Primary Outcome Measures:** Internal consistency, test-retest reliability, and discriminant  
52 validity of the J-OSDI as well as the optimal cut-off value to suspect DED.

53 **Results:** Of the participants, 152 had DED and 57 did not. The J-OSDI total score showed good  
54 internal consistency (Cronbach alpha = 0.884), test-retest reliability (interclass correlation  
55 coefficient = 0.910), and discriminant validity by known-group comparisons (non-DED, 19.4 ±  
56 16.0; DED, 37.7 ± 22.2;  $p < 0.001$ ). Factor validity was used to confirm 3 subscales within the  
57 J-OSDI according to the original version of the questionnaire. Concurrent validity was assessed  
58 by Pearson correlation analysis, and the J-OSDI total score was positively associated with the  
59 Dry Eye-Related Quality-of-Life Score ( $\gamma = 0.829$ ). The optimal cut-off value of the J-OSDI  
60 total score was 36.3 (AUC = 0.744).

61 **Conclusions:** The J-OSDI was validated in terms of reliability and validity as an effective tool  
62 for DED assessment and monitoring in the Japanese population.

63

64 **Keywords:** dry eye disease, J-OSDI, ocular surface disease index, OSDI, reliability, validity

1  
2  
3  
4 65  
5

6 66 **Strengths and limitations of this study:**  
7  
8

9 67 • This study provides the first validation data on the Japanese version of the ocular surface  
10 68 disease index (J-OSDI) questionnaire as the primary evaluation for dry eye disease (DED)  
11 69 diagnosis.

12  
13  
14 70 • The validated J-OSDI allows across-country epidemiological comparisons of  
15 71 patient-reported subjective symptoms of DED.

16  
17 72 • The main limitation is that this study was conducted at a single university hospital, which  
18 73 may limit the generalizability of the findings.  
19  
20  
21  
22  
23  
24  
25  
26  
27  
28  
29  
30  
31  
32  
33  
34  
35  
36  
37  
38  
39  
40  
41  
42  
43  
44  
45  
46  
47  
48  
49  
50  
51  
52  
53  
54  
55  
56  
57  
58  
59  
60

## 75 INTRODUCTION

76 The prevalence of dry eye disease (DED) continues to grow due to several  
77 psychosocioeconomic factors, including an increase in digital screen usage time, an aging  
78 population, and stressful social environments.[1, 2] DED can cause ocular surface damage, eye  
79 discomfort and impaired vision, and can also lead to substantial economic problems due to  
80 decreased quality of life and work productivity.[3, 4]

81 Diagnosis of DED can be made using various methods, including tear film breakup time  
82 (TFBUT), ocular surface staining, and osmolarity as a homeostasis marker. Additionally, the  
83 use of a questionnaire to determine if symptoms of DED are present is recommended as a  
84 primary examination method in the DED diagnosis protocol by the TFOS DEWS II Diagnostic  
85 Methodology report and in the 2016 Asia Dry Eye Society (ADES) consensus report.[5, 6]  
86 Although previous research has established a divergence between the subjective symptoms of  
87 DED and clinical severity of the disease,[7-9] questionnaires that can quantitatively measure the  
88 subjective symptoms of DED are indispensable for DED diagnosis and management.

89 The 2016 dry eye diagnostic criteria published by the ADES[6] recommend that DED be  
90 diagnosed according to both subjective symptoms and TFBUT, indicating that subjective  
91 symptoms are now widely recognized as playing an important role in DED. We previously  
92 showed that this change in diagnostic criteria could lead to a 28.0% increase in DED patients in  
93 Japan[2]; thus, the need for effective DED treatments may increase in the future. Both the OSDI  
94 and the Dry Eye-Related Quality-of-Life Score (DEQS)[10] are widely used to assess subjective  
95 symptoms of DED in Japan, but the reliability and validity of the OSDI have not been  
96 confirmed in Japan.[11] Determining the reliability and validity of the Japanese version of the  
97 OSDI (J-OSDI) is essential for making epidemiological and symptomatic comparisons with  
98 other countries.[11-14]

99 In this study, we developed and evaluated the reliability and validity of J-OSDI and  
100 determined the cut-off value of the J-OSDI total score using the 2016 diagnostic criteria put  
101 forth by the ADES.[6]

1  
2  
3  
4 1025  
6 103 **MATERIALS AND METHODS**7  
8 104 **Translation of the Japanese version of the Ocular Surface Disease Index**

9  
10 105 The OSDI questionnaire contains 12 questions divided into three subscales: ocular  
11 106 symptoms, vision related function, and environmental triggers.[11] The questionnaire asks  
12 107 patients to rate each symptom on a 5-point scale according to their frequency, from “all of the  
13 108 time” (score 4) to “none of the time” (score 0). The OSDI total score and each subscale score  
14 109 are separately translated to scores of 0–100. According to the OSDI total score, patients are  
15 110 classified as normal (0–12 points), mild (13–22 points), moderate (23–32 points), or severe  
16 111 DED (33–100 points). To obtain a scientifically accurate translation and to perform a  
17 112 transcultural validation of the original version of the questionnaire, a forward-backward  
18 113 procedure was applied to translate the OSDI from English to Japanese. The translation and  
19 114 transcultural adaptation process included translation of the original English version (Allegan  
20 115 Inc., Irvine, CA) of the OSDI into Japanese by five bilingual ophthalmologists, two bilingual  
21 116 epidemiologists, and one native-English researcher, each working individually. A cultural  
22 117 adaptation was conducted to ensure that the translated questionnaire is easily understandable for  
23 118 Japanese patients. The J-OSDI was then translated into English by five native-English  
24 119 researchers and was assessed for comprehensibility.

25  
26  
27  
28  
29  
30  
31  
32  
33  
34  
35  
36  
37  
38  
39  
40  
41  
42  
43  
44  
4546 121 **Study design and participants**

47 122 This cross-sectional observational study included 209 patients recruited between  
48 123 September 2017 to May 2018 from the Department of Ophthalmology at Juntendo University  
49 124 Hospital in Tokyo, Japan. Written informed consent was obtained from all participants. The  
50 125 study was approved by the Independent Ethics Committee at Juntendo University Hospital  
51 126 (Approval number, 17-088 and 18-082) and adhered to the tenets of the Declaration of Helsinki  
52 127 as revised in Brazil in 2013.

53  
54  
55  
56  
57  
58  
59 128  
60

## 129 **Exclusion criteria**

130 We excluded patients with BCVA values < 20/20 and those with a history of eyelid  
131 disorder, ptosis, Parkinson disease, ocular surface surgery, eyelid surgery, hereditary corneal  
132 disease, or any other disease that could affect blinking.

## 134 **Environmental conditions**

135 The temperature and humidity of the examination room were controlled at 26°C in the  
136 summer and 24°C in the winter with 50% relative humidity, according to the Guideline for  
137 Design and Operation of Hospital HVAC Systems established by the Healthcare Engineering  
138 Association of Japan.[15]

## 140 **Dry eye disease diagnosis and classification**

141 All patients underwent a complete ophthalmic evaluation for both eyes, including  
142 measuring BCVA, IOP, and subjective symptoms. Additionally, TFBUT, CFS for  
143 kerato-conjunctival vital staining, MBI, and Schirmer test I for reflex tear production were  
144 assessed for both eyes. TFBUT, CFS, and Schirmer test I values from the worst eye were  
145 examined. The mean value of MBI was used in accordance with a previous study.[16] For each  
146 patient, we evaluated TFBUT, CFS, and MBI before performing the Schirmer test I. We  
147 diagnosed DED and non-DED using the ADES 2016 diagnostic criteria,[6] which is based on  
148 two positive items: the presence of subjective symptoms and decreased TFBUT ( $\leq 5$  seconds).

## 150 **Subjective symptoms and DEQS**

151 Subjective symptoms were evaluated by interviewing subjects with DED. The DEQS  
152 questionnaire was administered to subjects in order to assess the severity of dry eye-associated  
153 symptoms and the multifaceted effects of DED on daily life.[10] The score derived from this  
154 questionnaire is a subjective measurement of DED symptoms, where 0 indicates the best score  
155 (no symptoms) and 100 indicates the worst score (maximum symptoms).



1  
2  
3  
4 1565  
6 157 **TFBUT**7  
8 158 TFBUT was measured using a fluorescein dye according to the standard methodology.[6]9  
10 159 Only a small quantity of dye was administered using the wetted fluorescein strip in order to11  
12 160 minimize the effect of the dye on tear volume and TFBUT. Each subject was instructed to blink13  
14 161 three times after the dye was applied to ensure adequate mixing of the dye and tears. The time15  
16 162 interval between the last blink and the appearance of the first dark spot on the cornea was17  
18 163 measured with a stopwatch. The mean value of three measurements was used. A cut-off value of19  
20 164 TFBUT  $\leq$  5 seconds was used to diagnose DED.[6]21  
22 16523  
24 166 **Kerato-conjunctival vital staining (CFS)**25  
26 167 CFS was graded according to the van Bijsterveld grading system,[17] which divides the27  
28 168 ocular surface into three zones: the nasal bulbar conjunctiva, the temporal bulbar conjunctiva,29  
30 169 and the cornea. Each zone was evaluated on a scale of 0–3, with 0 indicating no staining and 331  
32 170 indicating confluent staining. The maximum possible score was thus 9.33  
34 17135  
36 172 **MBI**37  
38 173 MBI was considered as the length of time that subjects could keep their eyes open before39  
40 174 blinking.[16] We calculated MBI twice by stopwatch under a light microscope without using41  
42 175 the light. MBI was recorded as 30 seconds if the blink interval exceeded 30 seconds.43  
44 17645  
46 177 **Schirmer test I**47  
48 178 The Schirmer test I was performed without topical anesthesia after all other examinations49  
50 179 had been completed. Schirmer's test strips (Ayumi Pharmaceutical Co., Tokyo, Japan) were51  
52 180 placed on the outer third of the temporal lower conjunctival fornix for 5 minutes. The strips53  
54 181 were then removed, and the length of dampened filter paper (in mm) was recorded.55  
56 18257  
58  
59  
60

## 183 **Reliability**

184 The internal consistency of the J-OSDI was assessed using Cronbach's alpha coefficient,  
185 with an alpha > 0.70 considered to be acceptable.[18] Test-retest reliability was evaluated by  
186 calculating the ICC values from the first and second entries. An ICC value of  $\geq 0.70$  was  
187 considered acceptable for test-retest reliability.[19]

188

## 189 **Validity**

190 Discriminant validity was evaluated by comparing the non-DED and DED groups. For  
191 factor validity, confirmatory factor analysis was conducted by an equamax rotation to determine  
192 whether the subscales in the J-OSDI cluster together in the same way as in the original OSDI.  
193 Factors with an eigenvalue > 0.90 were retained. Concurrent validity was assessed by  
194 calculating the correlations (Pearson coefficients) between J-OSDI total score or subscale scores  
195 and DEQS or other clinical results, including TFBUT, CFS, MBI, and Schirmer test I values.

196

## 197 **Statistical analyses**

198 To compare general characteristics between DED and non-DED participants, 2-tailed *t* tests  
199 were used for continuous variables and  $\chi^2$  tests were used for categorical variables. Pearson rank  
200 correlation coefficients were calculated to determine the correlations between J-OSDI, DEQS,  
201 TFBUT, MBI, and Schirmer test I results. ROC analysis was used to determine the optimal  
202 cut-off value of the J-OSDI total score for suspecting DED. AUC was computed using the  
203 trapezoidal rule. Data are presented as mean  $\pm$  standard deviation (SD) or proportion (%).  
204 Statistical analyses were performed using STATA version 15 (Stata Corp, TX) and SPSS  
205 Statistics v.1.0.0 (IBM Corp, Chicago, IL).  $p < 0.05$  was considered significant.

206

## 207 **Patient and public involvement**

208 No patients were involved in the research design and conception of this research study.

209

210

211 **RESULTS**212 **Participant characteristics**

213 Table 1 shows the general characteristics of the study participants. All subjects responded  
 214 to the questionnaires, completed the examination, and were eligible for the study. Overall, 209  
 215 participants were included. The average age was  $58.9 \pm 15.3$  years, and 83.7% of the  
 216 participants were women. Using the diagnostic criteria put forth by the ADES,[6] 152 and 57  
 217 patients were classified as DED (72.7%) and non-DED (27.3%), respectively. The mean best  
 218 corrected visual acuity (BCVA) value for both eyes was  $-0.07 \pm 0.02$  logMAR. The mean  
 219 intraocular pressure (IOP) for both eyes was  $14.1 \pm 2.9$  mmHg. Both the J-OSDI total score and  
 220 DEQS were significantly higher in the DED group than in the non-DED group, indicating that  
 221 DED patients showed a greater rate of subjective symptoms. Furthermore, both TFBUT and  
 222 maximum blink interval (MBI) were significantly lower in the DED group than the non-DED  
 223 group. Neither BCVA, IOP, corneal fluorescence staining (CFS), nor Schirmer test I results  
 224 differed significantly between DED and non-DED participants.

226 **Table 1.** Characteristics of study participants.

|                              | <b>non-DED</b>  | <b>DED</b>      | <b>p value</b> | <b>Total</b>    |
|------------------------------|-----------------|-----------------|----------------|-----------------|
|                              | <b>n = 57</b>   | <b>n = 152</b>  |                | <b>n = 209</b>  |
| Age, year $\pm$ SD           | 61.4 $\pm$ 15.5 | 57.9 $\pm$ 15.2 | 0.149          | 58.9 $\pm$ 15.3 |
| Gender, female (%)           | 48 (84.2)       | 127 (83.6)      | 1.000          | 175 (83.7)      |
| BCVA, logMAR $\pm$ SD        | -0.1 $\pm$ 0.0  | -0.1 $\pm$ 0.0  | 0.513          | -0.1 $\pm$ 0.0  |
| IOP, mmHg $\pm$ SD           | 14.6 $\pm$ 2.9  | 13.8 $\pm$ 2.7  | 0.062          | 14.0 $\pm$ 2.8  |
| Subjective symptoms, yes (%) | 5 (8.8)         | 152 (100)       | ***< 0.001     | 157 (75.1)      |
| J-OSDI, 0–100 $\pm$ SD       | 19.4 $\pm$ 16.0 | 37.7 $\pm$ 22.2 | ***< 0.001     | 32.7 $\pm$ 29.7 |

|                     |             |             |            |             |
|---------------------|-------------|-------------|------------|-------------|
| DEQS, 0–100 ± SD    | 16.0 ± 14.7 | 32.7 ± 21.6 | ***< 0.001 | 28.1 ± 21.3 |
| TFBUT, seconds ± SD | 2.5 ± 2.4   | 1.5 ± 0.8   | ***< 0.001 | 1.7 ± 1.5   |
| CFS, 0–9 ± SD       | 2.8 ± 2.5   | 3.3 ± 2.6   | 0.192      | 3.2 ± 2.6   |
| Schirmer I, mm ± SD | 7.2 ± 8.2   | 5.7 ± 6.2   | 0.162      | 6.1 ± 6.8   |
| MBI, seconds ± SD   | 15.1 ± 8.1  | 10.5 ± 6.3  | ***< 0.001 | 11.7 ± 7.1  |

DED, dry eye disease; BCVA, best-corrected visual acuity; IOP, intraocular pressure; J-OSDI, Japanese version of ocular surface disease index; DEQS, Dry Eye-Related Quality-of-Life Score; TFBUT, tear film breakup time; CFS, corneal fluorescein staining; MBI, maximum blink interval. p values were determined using the Student's t-test (two-tailed) for continuous variables and the chi-square test for categorical variables. \*\*\*p < 0.001.

233

### 234 Reliability

235 We tested the J-OSDI total score and subscale scores for internal consistency and test-retest  
 236 reliability, and the results are shown in Table 2. For internal consistency, the Cronbach's alpha  
 237 coefficient was 0.884 for the J-OSDI total score and 0.788, 0.669, and 0.902 for the ocular  
 238 symptoms, vision-related function, and environmental triggers subscales, respectively.  
 239 Test-retest reliability was evaluated in 173 participants, with a median (IQR) period of 119  
 240 (81–182) days between the test and retest. The intraclass correlation coefficient (ICC) values  
 241 were 0.910, 0.649, 0.817, and 0.859 for the J-OSDI total score, ocular symptoms subscale,  
 242 vision-related function subscale, and environmental triggers subscale, respectively.

243 **Table 2.** Reliability for each subscale

|                         |                        | <b>Cronbach <math>\alpha</math></b> | <b>ICC</b>       |
|-------------------------|------------------------|-------------------------------------|------------------|
|                         | <b>Number of items</b> | <b>(n = 209)</b>                    | <b>(n = 173)</b> |
| J-OSDI total score      | 12                     | 0.884                               | 0.910            |
| Ocular symptoms         | 5                      | 0.788                               | 0.649            |
| Vision-related function | 4                      | 0.669                               | 0.817            |

Environmental triggers 3 0.902 0.859

244 J-OSDI, Japanese version of the ocular surface disease index; ICC; intra-class correlation  
245 coefficient.

246

### 247 **Discriminant validity**

248 Table 3 shows the mean values for the J-OSDI total score, each of the subscale scores, and  
249 each of the component scores. The mean J-OSDI total score was significantly higher in the  
250 DED group than in the non-DED group (DED,  $37.7 \pm 22.2$ ; non-DED,  $19.4 \pm 16.0$ ;  $p < 0.001$ ).  
251 Additionally, all three subscales were significantly higher in the DED group than in the  
252 non-DED group (ocular symptoms: DED,  $34.6 \pm 21.6$ ; non-DED,  $20.9 \pm 17.4$ ;  $p < 0.001$ ;  
253 vision-related function: DED,  $36.5 \pm 27.7$ ; non-DED,  $20.8 \pm 22.0$ ;  $p < 0.001$ ; environmental  
254 triggers: DED,  $45.2 \pm 29.7$ ; non-DED,  $15.5 \pm 19.8$ ;  $p < 0.001$ ). Eleven of the 12 (92%)  
255 component scores were significantly higher in the DED group than in the non-DED group, with  
256 only question 2 showing a non-significant difference.

257 **Table 3.** J-OSDI score for each question.

| Classification, score $\pm$ SD, score | non-DED<br>n = 57 | DED<br>n = 152  | p value       | Total<br>n = 209 |
|---------------------------------------|-------------------|-----------------|---------------|------------------|
| J-OSDI total score, 0–100             | $19.4 \pm 16.0$   | $37.7 \pm 22.2$ | *** $< 0.001$ | $32.7 \pm 22.2$  |
| Ocular symptoms, 0–100                | $20.9 \pm 17.4$   | $34.6 \pm 21.6$ | *** $< 0.001$ | $30.9 \pm 21.4$  |
| 1. Eyes that are sensitive to light?  | $0.8 \pm 0.9$     | $1.5 \pm 1.3$   | *** $< 0.001$ | $1.3 \pm 1.3$    |
| 2. Eyes that feel gritty?             | $0.8 \pm 1.2$     | $1.0 \pm 1.0$   | 0.338         | $1.0 \pm 1.1$    |
| 3. Painful or sore eyes?              | $0.4 \pm 0.7$     | $1.0 \pm 1.0$   | *** $< 0.001$ | $0.8 \pm 1.0$    |
| 4. Blurred vision?                    | $1.1 \pm 1.0$     | $1.6 \pm 1.2$   | **0.002       | $1.5 \pm 1.2$    |
| 5. Poor vision?                       | $1.1 \pm 1.1$     | $1.8 \pm 1.3$   | *** $< 0.001$ | $1.6 \pm 1.3$    |
| Vision-related function               | $20.8 \pm 22.0$   | $36.5 \pm 27.7$ | *** $< 0.001$ | $32.2 \pm 27.2$  |

|                                                      |             |             |            |             |
|------------------------------------------------------|-------------|-------------|------------|-------------|
| 6. Reading?                                          | 0.8 ± 1.1   | 1.6 ± 1.3   | ***< 0.001 | 1.4 ± 1.3   |
| 7. Driving at night?                                 | 0.4 ± 0.6   | 1.1 ± 1.4   | *0.022     | 0.9 ± 1.3   |
| 8. Working with a computer<br>or bank machine (ATM)? | 1.1 ± 1.3   | 1.6 ± 1.4   | *0.030     | 1.5 ± 1.4   |
| 9. Watching TV?                                      | 0.7 ± 1.0   | 1.3 ± 1.2   | **0.002    | 1.1 ± 1.1   |
| Environmental triggers                               | 15.5 ± 19.8 | 45.2 ± 29.7 | ***< 0.001 | 37.1 ± 30.4 |
| 10. Windy conditions?                                | 0.7 ± 0.9   | 1.9 ± 1.4   | ***< 0.001 | 1.5 ± 1.3   |
| 11. Places or areas with low humidity<br>(very dry)? | 0.5 ± 0.8   | 1.6 ± 1.3   | ***< 0.001 | 1.3 ± 1.3   |
| 12. Areas that are air conditioned?                  | 0.6 ± 0.9   | 2.0 ± 1.3   | ***< 0.001 | 1.6 ± 1.3   |

258 DED, Dry eye disease; J-OSDI, Japanese version of ocular surface disease index. p values

259 were determined using the Student's t-test. \*p < 0.05, \*\*p < 0.01, and \*\*\*p < 0.001.

260

## 261 Factor validity

262 Factor validity was assessed by confirmatory factor analysis to determine the subscales. As  
 263 shown in Figure 1, correspondent with the three homogeneous content domains that were  
 264 identified and constructed; three factors were rotated to an equamax solution. These three  
 265 factors accounted for 71.9% of the total variance, and each factor was comprised of sets of items  
 266 that were interpretable and relevant in content. Factor 1, accounting for 53.0% of the total  
 267 variance and 23.6% of the common variance, was comprised of items assessing the frequency of  
 268 ocular symptoms (5 items). Factor 2, accounting for 11.1% of the total variance and 22.8% of  
 269 the common variance, was comprised of items assessing the frequency of vision-related  
 270 function (4 items). Factor 3, accounting for 7.7% of the total variance and 17.7% of the  
 271 common variance, was comprised of items assessing the frequency of environmental triggers (3  
 272 items). All factors were in accordance with the subscales in the original version. The factor

273 matrix of each J-OSDI component can be viewed in Supplemental Table 1. All subscales and  
 274 the total instrument underwent formal reliability and validity testing.

275

### 276 **Concurrent validity**

277 Table 4 shows the correlations between J-OSDI total score, subscale scores, and other  
 278 clinical items related to DED diagnosis, including DEQS, TFBUT, CFS, Schirmer test I results,  
 279 and MBI. J-OSDI total score was significantly and positively correlated with DEQS ( $\gamma = 0.829$ ).  
 280 Among the clinical items related to DED diagnosis, there was a modest but significant negative  
 281 correlation between J-OSDI total score and MBI ( $\gamma = -0.258$ ). The subscales were each  
 282 significantly and positively correlated with DEQS score ( $\gamma = 0.786, 0.702$  and  $0.650$ ,  
 283 respectively), while ocular symptoms and environmental triggers were significantly and  
 284 negatively correlated with MBI ( $\gamma = -0.195$  and  $-0.370$ , respectively).

285

286 **Table 4.** Correlation between J-OSDI total score and other clinical assessments.

| Clinical Items | OSDI total score |            | Ocular symptoms |            | Vision-related function |            | Environmental triggers |            |
|----------------|------------------|------------|-----------------|------------|-------------------------|------------|------------------------|------------|
|                | $\gamma$         | p value    | $\gamma$        | p value    | $\gamma$                | p value    | $\gamma$               | p value    |
| DEQS           | 0.829            | ***< 0.001 | 0.786           | ***< 0.001 | 0.702                   | ***< 0.001 | -0.650                 | ***< 0.001 |
| TFBUT          | -0.066           | 0.349      | -0.044          | 0.532      | -0.057                  | 0.416      | -0.131                 | 0.063      |
| CFS            | 0.018            | 0.791      | -0.013          | 0.852      | -0.137                  | *0.049     | 0.161                  | *0.022     |
| Schirmer I     | -0.090           | 0.195      | -0.013          | 0.844      | -0.071                  | 0.311      | -0.129                 | 0.067      |
| MBI            | -0.283           | ***< 0.001 | -0.215          | **0.002    | -0.135                  | 0.053      | -0.407                 | ***< 0.001 |

287 J-OSDI, Japanese version of the ocular surface disease index; DEQS, Dry Eye-Related

288 Quality-of-Life Score; TFBUT, tear film breakup time; CFS, corneal fluorescein staining;

289 MBI, maximum blink interval. Pearson rank correlation coefficient was used to determine

1  
2  
3  
4 290 the correlations between the J-OSDI total score and subscale scores and various clinical  
5  
6 291 assessments. \*  $p < 0.05$ , \*\* $p < 0.01$  and \*\*\* $p < 0.001$ .  
7  
8

9 292

### 10 293 **J-OSDI severity results and cut-off value for detecting DED**

11  
12  
13 294 Figure 2A shows the proportion of DED participants in each severity category as  
14  
15 295 determined by J-OSDI total score. The clinically diagnosed DED patients were divided  
16  
17 296 according to their J-OSDI scores as follows: 22.0% were categorized as normal, 17.2% were  
18  
19 297 categorized as mild DED, 12.9% were categorized as moderate DED, and 47.8% were  
20  
21 298 categorized as severe DED. Figure 2B shows the proportion of patients who were clinically  
22  
23 299 diagnosed with DED in each severity category determined by J-OSDI total scores. Overall,  
24  
25 300 47.8% of the patients who were classified as normal by their J-OSDI total score were clinically  
26  
27 301 diagnosed with DED, while 66.7%, 74.0%, and 86.0% of patients classified as mild, moderate,  
28  
29 302 and severe, respectively, were clinically diagnosed with DED. Figure 2C shows the receiver  
30  
31 303 operating characteristic (ROC) curve of the J-OSDI total score from the non-DED and DED  
32  
33 304 groups, which was used to determine the diagnostic efficacy of the J-OSDI total score. The  
34  
35 305 optimum cut-off value for detecting DED was 36.3 points, with an area under the curve (AUC),  
36  
37 306 sensitivity, and specificity of 0.744, 51.3%, and 87.7%, respectively. Supplemental Table 1  
38  
39 307 shows the details of the J-OSDI total score sensitivity and specificity analysis.  
40  
41  
42

43 308

### 44 309 **DISCUSSION**

45  
46  
47 310 DED is a major ocular disease that affects at least 344 million people worldwide and  
48  
49 311 causes a variety of symptoms.[1, 5, 6]. Particularly in Japan, many people have DED due to  
50  
51 312 genetic risk factors and increasing usage of digital devices.[2, 20] Therefore, quantifying the  
52  
53 313 symptoms and severity of DED is important for the diagnosis, monitoring, and treatment of this  
54  
55 314 condition. Indeed, evaluation of subjective symptoms for DED diagnosis is regarded as the  
56  
57 315 primary examination tool in both the DEWS II report[5] and the 2016 ADES diagnostic  
58  
59  
60



1  
2  
3  
4 316 criteria.[6] In particular, the diagnostic criteria from the ADES use the presence of subjective  
5  
6 317 symptoms and a decreased TFBUT, indicating the importance of accurately quantifying  
7  
8 318 subjective symptoms in DED. The OSDI is a questionnaire widely used to quantify subjective  
9  
10 319 symptoms in DED but the reliability and validity of this test has not been examined in Japan. In  
11  
12 320 this study, we assessed the reliability and validity of the J-OSDI, which is the Japanese version  
13  
14 321 of OSDI, and determined a cut-off value using the ADES diagnostic criteria of 2016. Our results  
15  
16 322 validate the use of the J-OSDI in Japan and make it possible to compare epidemiological results  
17  
18 323 between Japan and other countries.

21 324 We used factor analysis to confirm three subscales within the J-OSDI: ocular symptoms,  
22  
23 325 vision-related function, and environmental triggers. All of these were in accordance with the  
24  
25 326 subscales in the original English version (Figure 1). The J-OSDI total score showed both high  
26  
27 327 internal consistency and test-retest reliability (Table 2). For the subscales, factor analysis  
28  
29 328 confirmed three subscales which were in accordance with the subscales in the original English  
30  
31 329 version (Figure 1). Two of the subscales, ocular symptoms and environmental triggers, showed  
32  
33 330 good internal consistency, while the third subscale, vision-related function, only showed modest  
34  
35 331 internal consistency. Because the questions in the vision-related function subscale are concerned  
36  
37 332 with daily activities, including reading, driving at night, working with a computer or bank  
38  
39 333 machine (ATM), and watching TV, the individual variation for these behaviors naturally affects  
40  
41 334 the internal consistency of this subscale. The test-retest reliability of the subscales demonstrates  
42  
43 335 that vision-related function and environmental triggers have good reliability. However, the  
44  
45 336 reliability of the ocular symptoms subscale was only modest, indicating that the answers to this  
46  
47 337 subscale may have varied because of the known fluctuations in the subjective symptoms of  
48  
49 338 DED.[21, 22]

52 339 The J-OSDI total score and subscale scores were significantly higher in the DED group  
53  
54 340 compared to the non-DED group, verifying the discriminant validity of the J-OSDI (Table 3).  
55  
56 341 Further, the percentage of participants who were clinically diagnosed with DED increased  
57  
58 342 proportionally in each severity category, indicating that the J-OSDI total score can discriminate  
59  
60

1  
2  
3  
4 343 DED (Figure 2B). Our study also determined that the optimal J-OSDI total score cut-off value  
5  
6 344 for detecting DED according to ADES criteria was 36.3. One previous study reported an OSDI  
7  
8 345 total score cut-off value of 15.[11] However, the difference between this cut-off value and that  
9  
10 346 of the current study is probably the result of differences in the methods used to clinically  
11  
12 347 diagnose severity of DED, as the previous study used lissamine green staining, Schirmer test I,  
13  
14 348 and patient perception of ocular symptoms. In contrast, the current study used TFBUT as an  
15  
16 349 essential part of our diagnostic criteria.[5, 6] Supplemental Table 2 shows the sensitivity and  
17  
18 350 specificity of our reported cut-off value and the cut-off values for the different severity  
19  
20 351 categories: normal (0–12), mild (13–22), moderate (23–32) and severe (33–100).[11] Our  
21  
22 352 results suggest that it is necessary to re-evaluate the OSDI total score cut-off values for  
23  
24 353 diagnosis and severity categories to reflect the changes made to the diagnostic criteria for  
25  
26 354 DED.[5, 6, 23-28]

27  
28  
29 355 Table 4 shows the correlations between J-OSDI total score and other clinical tests,  
30  
31 356 including DEQS, TFBUT, CFS, MBI, and Schirmer test I. J-OSDI total score showed a strong  
32  
33 357 positive correlation with DEQS score. Because the DEQS has been validated in Japan,[10] this  
34  
35 358 result supports the use of the J-OSDI as a valid method of quantifying subjective symptoms. In  
36  
37 359 contrast, the respective correlations between J-OSDI total score and TFBUT, CFS, and  
38  
39 360 Schirmer I were relatively low. This is consistent with previous studies that reported low  
40  
41 361 correlations and high divergence between subjective symptoms assessed by questionnaires and  
42  
43 362 clinical tools,[2, 19, 25] underscoring the importance of combining knowledge about subjective  
44  
45 363 symptoms and clinical tools in order to effectively evaluate and monitor DED. Our group[16]  
46  
47 364 has proposed MBI as a simple self-check screening test for DED because it is highly correlated  
48  
49 365 with subjective symptoms compared with other dry eye items (Table 4). Because of the  
50  
51 366 divergence between the subjective and clinical symptoms of DED,[2] it is necessary to perform  
52  
53 367 multilateral evaluations using not only OSDI total scores but also the subscales and each  
54  
55 368 component. In the present study, we assessed the respective relationship between each subscale  
56  
57 369 and various clinical tools for DED examination and found that the ocular symptoms and  
58  
59  
60

1  
2  
3  
4 370 environmental trigger subscales were negatively correlated with MBI. We recently reported that  
5  
6 371 MBI is also significantly associated with TFBUT and CFS.[16] Our previous results and those  
7  
8 372 of this study suggest that MBI reflects both TFBUT and CFS results, possibly explaining its  
9  
10 373 negative correlation with the ocular symptoms and environmental triggers subscale scores of  
11  
12 374 J-OSDI.

13  
14 375 This study has several limitations. First, it was conducted at a single university hospital in  
15  
16 376 Japan, possibly introducing selection bias into our sample. Second, under the simplified ADES  
17  
18 377 diagnostic criteria, those with low TFBUTs can still be classified as non-DED due to a lack of  
19  
20 378 subjective symptoms; thus, our non-DED group showed a low TFBUT. Third, the test-retest  
21  
22 379 method that we used to confirm reliability introduced recall bias from the necessary length of  
23  
24 380 the test-retest period. Next, we did not account for differences in variables such as  
25  
26 381 socioeconomic status or education level, possibly affecting the responses. Finally, this study  
27  
28 382 was designed to investigate the J-OSDI as a primary evaluation and monitoring method for  
29  
30 383 DED. Thus, rose bengal stain scores, tear osmolality, meibomian gland dysfunction  
31  
32 384 assessments, and corneal sensations were not applied in this study. Despite these limitations, we  
33  
34 385 verified the reliability and validity of the J-OSDI for DED assessment and monitoring in Japan.

35  
36 386 In summary, we validated the J-OSDI by assessing its reliability and validity. We report  
37  
38 387 that a J-OSDI score of 36.3 is the optimal cut-off value for suspecting DED under the 2016  
39  
40 388 ADES criteria. We believe that J-OSDI will be useful for primary assessment and monitoring of  
41  
42 389 DED in routine clinical practice and in remote diagnosis.

43  
44  
45  
46  
47 390

48  
49 391 **Acknowledgments:** The authors thank the nurses and orthoptists of the Department of  
50  
51 392 Ophthalmology at the Juntendo University Hospital for collecting the data for DED diagnosis.

52  
53 393 **Author Contributions:**

1  
2  
3  
4 394 A.MI.: Performance of the research, data collection, data analysis, and writing of the paper; T.I.:  
5  
6 395 Performance of the research, research design, data analysis, and writing of the paper; S.N.:  
7  
8 396 Research design, data analysis; M.N.: Data analysis; M.I.: Research design, data analysis; K.F.:  
9  
10 397 Data collection, data analysis; Y.O.: Data collection, data analysis; N.I.: Data collection, data  
11  
12 398 analysis; A. E.: Data collection, data analysis; H.H.: Data collection, data analysis; H.K.:  
13  
14 399 Performance of the research; A.M.: Research design, writing of the paper; H.K.: Research  
15  
16 400 design, writing of the paper.

17  
18  
19  
20 401 **References**

- 21  
22 402 1. Stapleton F, Alves M, Bunya VY, et al. TFOS DEWS II Epidemiology Report. *Ocul Surf*  
23 403 2017;15:334-65.  
24 404 2. Inomata T, Shiang T, Iwagami M, et al. Changes in Distribution of Dry Eye Disease by the New 2016  
25 405 Diagnostic Criteria from the Asia Dry Eye Society. *Sci Rep* 2018;8:1918.  
26 406 3. Yu J, Asche CV, Fairchild CJ. The economic burden of dry eye disease in the United States: a decision  
27 407 tree analysis. *Cornea* 2011;30:379-87.  
28 408 4. Uchino M, Uchino Y, Dogru M, et al. Dry eye disease and work productivity loss in visual display  
29 409 users: the Osaka study. *Am J Ophthalmol* 2014;157:294-300.  
30 410 5. Wolffsohn JS, Arita R, Chalmers R, et al. TFOS DEWS II Diagnostic Methodology report. *Ocul Surf*  
31 411 2017;15:539-74.  
32 412 6. Tsubota K, Yokoi N, Shimazaki J, et al. New Perspectives on Dry Eye Definition and Diagnosis: A  
33 413 Consensus Report by the Asia Dry Eye Society. *Ocul Surf* 2017;15:65-76.  
34 414 7. Bourcier T, Acosta MC, Borderie V, et al. Decreased corneal sensitivity in patients with dry eye. *Invest*  
35 415 *Ophthalmol Vis Sci* 2005;46:2341-5.  
36 416 8. Hay EM, Thomas E, Pal B, et al. Weak association between subjective symptoms or and objective  
37 417 testing for dry eyes and dry mouth: results from a population based study. *Ann Rheum Dis*  
38 418 1998;57:20-4.  
39 419 9. Xu KP, Yagi Y, Tsubota K. Decrease in corneal sensitivity and change in tear function in dry eye.  
40 420 *Cornea* 1996;15:235-9.  
41 421 10. Sakane Y, Yamaguchi M, Yokoi N, et al. Development and validation of the Dry Eye-Related  
42 422 Quality-of-Life Score questionnaire. *JAMA Ophthalmol* 2013;131:1331-8.  
43 423 11. Schiffman RM, Christianson MD, Jacobsen G, et al. Reliability and validity of the Ocular Surface  
44 424 Disease Index. *Arch Ophthalmol* 2000;118:615-21.  
45 425 12. Pakdel F, Gohari MR, Jazayeri AS, et al. Validation of Farsi Translation of the Ocular Surface  
46 426 Disease Index. *J Ophthalmic Vis Res* 2017;12:301-04.  
47 427 13. Zheng B, Liu XJ, Sun YF, et al. Development and validation of the Chinese version of dry eye related  
48 428 quality of life scale. *Health Qual Life Outcomes* 2017;15:145.

- 1  
2  
3  
4 429 14. Santo RM, Ribeiro-Ferreira F, Alves MR, et al. Enhancing the cross-cultural adaptation and validation  
5 430 process: linguistic and psychometric testing of the Brazilian-Portuguese version of a self-report  
6 431 measure for dry eye. *J Clin Epidemiol* 2015;68:370-8.
- 7  
8 432 15. Healthcare Engineering Association of Japan Standard Working Group. The Guideline for Design and  
9 433 Operation of Hospital HVAC Systems. 2013
- 10  
11 434 16. Inomata T, Iwagami M, Hiratsuka Y, et al. Maximum blink interval is associated with tear film  
12 435 breakup time: A new simple, screening test for dry eye disease. *Sci Rep* 2018;8:13443.
- 13  
14 436 17. van Bijsterveld OP. Diagnostic tests in the Sicca syndrome. *Arch Ophthalmol* 1969;82:10-4.
- 15  
16 437 18. Cronbach. LJ. Coefficient alpha and the internal structure of tests. *Psychometrika* 1951;16:297-334.
- 17  
18 438 19. Deyo RA, Diehr P, Patrick DL. Reproducibility and responsiveness of health status measures.  
19 439 Statistics and strategies for evaluation. *Control Clin Trials* 1991;12:142S-58S.
- 20  
21 440 20. Uchino M, Yokoi N, Uchino Y, et al. Prevalence of dry eye disease and its risk factors in visual  
22 441 display terminal users: the Osaka study. *Am J Ophthalmol* 2013;156:759-66.
- 23  
24 442 21. Nepp J, Wirth M. Fluctuations of Corneal Sensitivity in Dry Eye Syndromes--A Longitudinal Pilot  
25 443 Study. *Cornea* 2015;34:1221-6.
- 26  
27 444 22. Alves M, Reinach PS, Paula JS, et al. Comparison of diagnostic tests in distinct well-defined  
28 445 conditions related to dry eye disease. *PloS one* 2014;9:e97921.
- 29  
30 446 23. Schirmer O. Studien zur physiologie und pathologie der tranenabsonderung und tranenabfuhr. *Graefes*  
31 447 *Arch Clin Exp Ophthalmol* 1903;56:197-291.
- 32  
33 448 24. Shimazaki J. Definition and criteria of dry eye. *Ganka* 1995;37:765-70.
- 34  
35 449 25. Lemp MA. Report of the National Eye Institute/Industry workshop on Clinical Trials in Dry Eyes.  
36 450 *CLAO J* 1995;21:221-32.
- 37  
38 451 26. The definition and classification of dry eye disease: report of the Definition and Classification  
39 452 Subcommittee of the International Dry Eye WorkShop (2007). *Ocul Surf* 2007;5:75-92.
- 40  
41 453 27. Shimazaki J. TK, Kinoshita S., Ohashi Y. Definition and diagnosis of dry eye 2006. *Atarashii Ganka*  
42 454 2007;24:181-84.
- 43  
44 455 28. AAO Cornea/External Disease PPP Panel HCfQEC. Dry Eye Syndrome 2013 [Available from:  
45 456 <https://www.aao.org/preferred-practice-pattern/dry-eye-syndrome-ppp--2013> accessed  
46 457 December 30 2016.
- 47  
48 458  
49 459

48 **Figure 1. Three subscales of J-OSDI as determined by factor analysis.** The existence of  
49  
50 461 3 clusters that were used as subscales are shown. These were in accordance with the  
51  
52 462 subscales that are used in the original version of OSDI: vision-related function  
53  
54 463 (components 1–5), ocular symptoms (components 6–9), and environmental triggers  
55  
56 464 (components 10–12).

1  
2  
3  
4 465  
5  
6

7 466 **Figure 2. Clinical utility of J-OSDI for evaluating dry eye disease (DED).** (a) The  
8  
9 467 proportion of patients in each DED severity category as determined by the J-OSDI total  
10  
11 468 score. (b) The proportion of patients who were clinically diagnosed with DED by category  
12  
13 469 of severity according to the J-OSDI total score. (c) The Receiver Operator Characteristic  
14  
15 470 (ROC) curve for the diagnosis of DED determined by the Asia Dry Eye Society 2016  
16  
17 471 criteria using J-OSDI. The area under the ROC curve (AUC) is 0.744.  
18  
19

20  
21 472

22  
23 473 **Supplementary Information**

24  
25 474 **Supplemental Table 1: Factor matrix of each J-OSDI question.** Results of factor analysis of each J-OSDI  
26 475 question. All of three subscales were in accordance with the subscales in the original version.

27  
28 476 **Supplemental Table 2: J-OSDI total score sensitivity and specificity analysis results.** Full results of the  
29 477 sensitivity and specificity analysis. Our reported cut-off value for suspecting dry eye disease was 36.3.  
30  
31  
32  
33  
34  
35  
36  
37  
38  
39  
40  
41  
42  
43  
44  
45  
46  
47  
48  
49  
50  
51  
52  
53  
54  
55  
56  
57  
58  
59  
60

1  
2  
3  
4  
5  
6  
7  
8  
9  
10  
11  
12  
13  
14  
15  
16  
17  
18  
19  
20  
21  
22  
23  
24  
25  
26  
27  
28  
29  
30  
31  
32  
33  
34  
35  
36  
37  
38  
39  
40  
41  
42  
43  
44  
45  
46  
47  
48  
49  
50  
51  
52  
53  
54  
55  
56  
57  
58  
59  
60

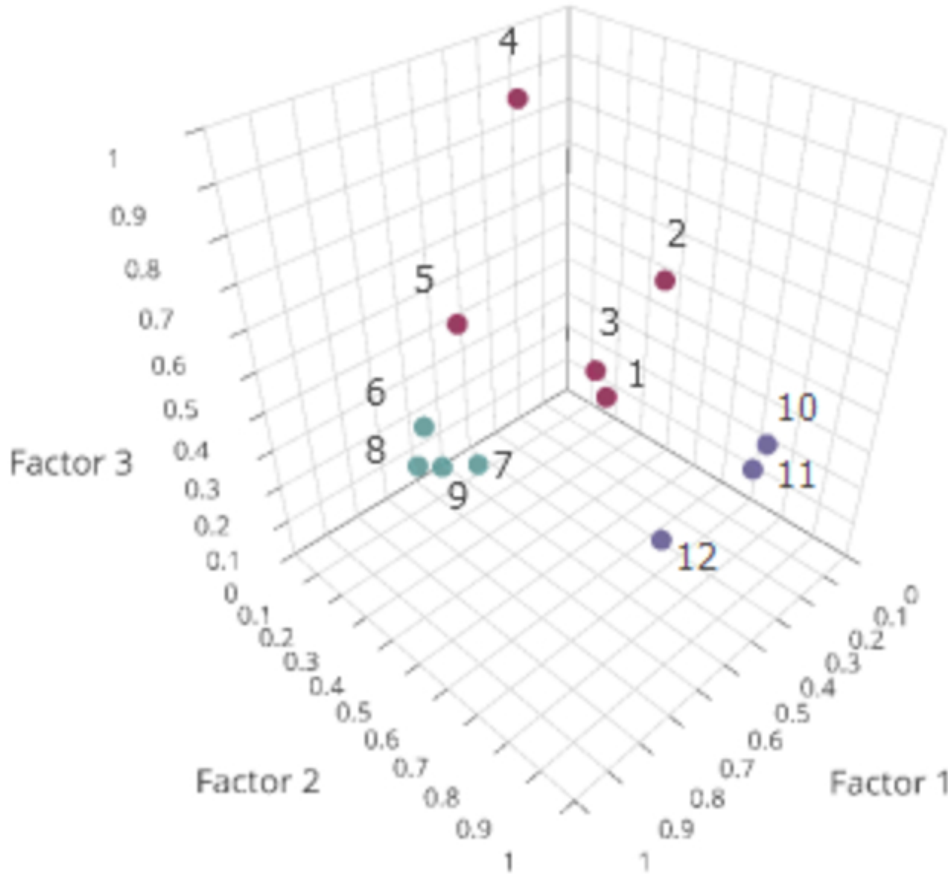

Figure 1

185x173mm (90 x 90 DPI)

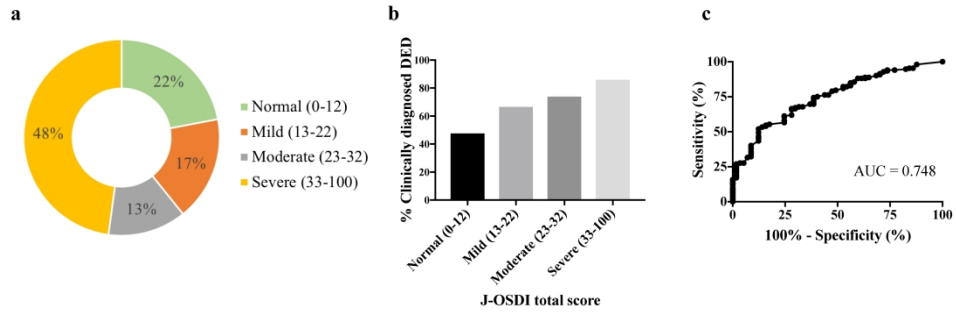

Figure 2



## Supplementary Information

### From: Reliability and Validity of the Japanese Version of the Ocular Surface Disease Index for Dry Eye Disease

Akie Midorikawa-Inomata RN, MPH, Takenori Inomata MD, PhD, MBA, Soko Nojiri, MPH, Masahiro Nakamura MD, PhD, Masao Iwagami MD, MPH, MSc, PhD, Keiichi Fujimoto MD, Yuichi Okumura MD, Nanami Iwata, Atsuko Eguchi, Hitomi Hasegawa MD, Hikaru Kinouchi, Akira Murakami MD, PhD, and Hiroyuki Kobayashi MD, PhD.

**Supplemental Table 1: Factor matrix of each J-OSDI question**

| Components | Factor |       |       |
|------------|--------|-------|-------|
|            | 1      | 2     | 3     |
| 1          | 0.352  | 0.474 | 0.361 |
| 2          | 0.055  | 0.393 | 0.504 |
| 3          | 0.256  | 0.349 | 0.331 |
| 4          | 0.335  | 0.167 | 0.927 |
| 5          | 0.632  | 0.269 | 0.573 |
| 6          | 0.706  | 0.208 | 0.323 |
| 7          | 0.576  | 0.246 | 0.171 |
| 8          | 0.710  | 0.172 | 0.198 |
| 9          | 0.719  | 0.283 | 0.260 |
| 10         | 0.156  | 0.815 | 0.307 |
| 11         | 0.239  | 0.837 | 0.295 |
| 12         | 0.441  | 0.742 | 0.159 |

J-OSDI, Japanese version of the Ocular Surface Disease Index.

Extraction Method: Maximum likelihood method; Rotation Method: Equamax with Kaiser normalization

**Supplemental Table 2: J-OSDI total score sensitivity and specificity analysis results**

| J-OSDI total score | Sensitivity (%) | Specificity (%) |
|--------------------|-----------------|-----------------|
| > 1.05             | 98.03           | 12.28           |
| > 2.2              | 95.39           | 14.04           |
| > 2.4              | 95.39           | 15.79           |
| > 3.35             | 94.74           | 17.54           |
| > 4.9              | 94.08           | 22.81           |
| > 5.95             | 94.08           | 26.32           |
| > 6.55             | 92.76           | 28.07           |
| > 6.95             | 91.45           | 29.82           |
| > 7.3              | 90.79           | 29.82           |
| > 7.9              | 90.13           | 31.58           |
| > 9.15             | 88.82           | 35.09           |
| > 10.2             | 88.82           | 36.84           |
| > 10.9             | 88.16           | 38.6            |
| > 11.95            | 88.16           | 40.35           |
| > 13.05            | 84.87           | 42.11           |
| > 14.1             | 84.21           | 43.86           |
| > 14.8             | 82.24           | 43.86           |
| > 15.3             | 81.58           | 45.61           |
| > 15.75            | 81.58           | 47.37           |
| > 16.3             | 80.26           | 47.37           |
| > 17.45            | 78.95           | 50.88           |
| > 18.5             | 78.29           | 52.63           |
| > 19.1             | 75.66           | 54.39           |
| > 19.7             | 75.66           | 56.14           |

|         |       |       |
|---------|-------|-------|
| > 20.25 | 74.34 | 59.65 |
| > 20.65 | 73.68 | 61.4  |
| > 21.35 | 72.37 | 61.4  |
| > 22.05 | 71.05 | 61.4  |
| > 22.35 | 70.39 | 61.4  |
| > 22.6  | 69.08 | 61.4  |
| > 23.85 | 69.08 | 63.16 |
| > 26.15 | 67.11 | 66.67 |
| > 27.4  | 67.11 | 68.42 |
| > 27.8  | 66.45 | 70.18 |
| > 28.65 | 65.79 | 70.18 |
| > 29.35 | 65.13 | 71.93 |
| > 29.75 | 61.18 | 71.93 |
| > 30.3  | 60.53 | 75.44 |
| > 30.95 | 59.87 | 75.44 |
| > 31.55 | 57.24 | 75.44 |
| > 32.55 | 55.92 | 75.44 |
| > 33.7  | 54.61 | 82.46 |
| > 34.55 | 53.95 | 84.21 |
| > 35.2  | 53.29 | 84.21 |
| > 35.75 | 52.63 | 85.96 |
| > 36.25 | 51.32 | 87.72 |
| > 36.95 | 48.68 | 87.72 |
| > 38.55 | 46.05 | 87.72 |
| > 39.8  | 44.74 | 87.72 |
| > 40.85 | 42.76 | 87.72 |
| > 42.1  | 39.47 | 91.23 |

|         |       |       |
|---------|-------|-------|
| > 42.85 | 38.82 | 91.23 |
| > 43.5  | 38.16 | 91.23 |
| > 44.4  | 36.84 | 91.23 |
| > 45.4  | 34.87 | 91.23 |
| > 46.5  | 33.55 | 91.23 |
| > 47.35 | 32.89 | 91.23 |
| > 47.6  | 32.24 | 91.23 |
| > 47.8  | 31.58 | 91.23 |
| > 48.95 | 30.92 | 92.98 |
| > 51.05 | 27.63 | 94.74 |
| > 52.2  | 26.97 | 98.25 |
| > 52.4  | 25.66 | 98.25 |
| > 53.35 | 25    | 98.25 |
| > 54.35 | 23.03 | 98.25 |
| > 55.4  | 21.71 | 98.25 |
| > 56.55 | 21.05 | 98.25 |
| > 57.15 | 20.39 | 98.25 |
| > 57.9  | 18.42 | 98.25 |
| > 58.7  | 17.11 | 98.25 |
| > 59.75 | 16.45 | 98.25 |
| > 61.45 | 15.79 | 100   |
| > 63.05 | 15.13 | 100   |
| > 63.75 | 13.82 | 100   |
| > 64.25 | 13.16 | 100   |
| > 66.05 | 11.84 | 100   |
| > 67.7  | 9.868 | 100   |
| > 68.35 | 9.211 | 100   |

|         |       |     |
|---------|-------|-----|
| > 69.65 | 8.553 | 100 |
| > 70.65 | 7.895 | 100 |
| > 71.85 | 7.237 | 100 |
| > 75    | 6.579 | 100 |
| > 77.2  | 5.921 | 100 |
| > 78.25 | 4.605 | 100 |
| > 82.1  | 3.947 | 100 |
| > 85.7  | 2.632 | 100 |
| > 87.5  | 1.974 | 100 |
| > 89.3  | 1.316 | 100 |

J-OSDI, Japanese version of the Ocular Surface Disease Index

STROBE Statement—Checklist of items that should be included in reports of *cross-sectional studies*

|                              | Item No | Recommendation                                                                                                                                                                                               | Page No |
|------------------------------|---------|--------------------------------------------------------------------------------------------------------------------------------------------------------------------------------------------------------------|---------|
| <b>Title and abstract</b>    | 1       | (a) Indicate the study's design with a commonly used term in the title or the abstract                                                                                                                       | 1,2     |
|                              |         | (b) Provide in the abstract an informative and balanced summary of what was done and what was found                                                                                                          | 1,2     |
| <b>Introduction</b>          |         |                                                                                                                                                                                                              |         |
| Background/rationale         | 2       | Explain the scientific background and rationale for the investigation being reported                                                                                                                         | 4       |
| Objectives                   | 3       | State specific objectives, including any prespecified hypotheses                                                                                                                                             | 4       |
| <b>Methods</b>               |         |                                                                                                                                                                                                              |         |
| Study design                 | 4       | Present key elements of study design early in the paper                                                                                                                                                      | 5-8     |
| Setting                      | 5       | Describe the setting, locations, and relevant dates, including periods of recruitment, exposure, follow-up, and data collection                                                                              | 5-6     |
| Participants                 | 6       | (a) Give the eligibility criteria, and the sources and methods of selection of participants                                                                                                                  | 5       |
| Variables                    | 7       | Clearly define all outcomes, exposures, predictors, potential confounders, and effect modifiers. Give diagnostic criteria, if applicable                                                                     | 6-8     |
| Data sources/<br>measurement | 8*      | For each variable of interest, give sources of data and details of methods of assessment (measurement). Describe comparability of assessment methods if there is more than one group                         | 6-8     |
| Bias                         | 9       | Describe any efforts to address potential sources of bias                                                                                                                                                    | 17      |
| Study size                   | 10      | Explain how the study size was arrived at                                                                                                                                                                    | 9       |
| Quantitative variables       | 11      | Explain how quantitative variables were handled in the analyses. If applicable, describe which groupings were chosen and why                                                                                 | 6-8     |
| Statistical methods          | 12      | (a) Describe all statistical methods, including those used to control for confounding                                                                                                                        | 8       |
|                              |         | (b) Describe any methods used to examine subgroups and interactions                                                                                                                                          | 8       |
|                              |         | (c) Explain how missing data were addressed                                                                                                                                                                  | 8       |
|                              |         | (d) If applicable, describe analytical methods taking account of sampling strategy                                                                                                                           | N/A     |
|                              |         | (e) Describe any sensitivity analyses                                                                                                                                                                        | N/A     |
| <b>Results</b>               |         |                                                                                                                                                                                                              |         |
| Participants                 | 13*     | (a) Report numbers of individuals at each stage of study—eg numbers potentially eligible, examined for eligibility, confirmed eligible, included in the study, completing follow-up, and analysed            | 9       |
|                              |         | (b) Give reasons for non-participation at each stage                                                                                                                                                         | 9       |
|                              |         | (c) Consider use of a flow diagram                                                                                                                                                                           | N/A     |
| Descriptive data             | 14*     | (a) Give characteristics of study participants (eg demographic, clinical, social) and information on exposures and potential confounders                                                                     | 9, 10   |
|                              |         | (b) Indicate number of participants with missing data for each variable of interest                                                                                                                          | 9       |
| Outcome data                 | 15*     | Report numbers of outcome events or summary measures                                                                                                                                                         | 9-11    |
| Main results                 | 16      | (a) Give unadjusted estimates and, if applicable, confounder-adjusted estimates and their precision (eg, 95% confidence interval). Make clear which confounders were adjusted for and why they were included | N/A     |

|                          |    |                                                                                                                                                                            |       |
|--------------------------|----|----------------------------------------------------------------------------------------------------------------------------------------------------------------------------|-------|
|                          |    | (b) Report category boundaries when continuous variables were categorized                                                                                                  | 5     |
|                          |    | (c) If relevant, consider translating estimates of relative risk into absolute risk for a meaningful time period                                                           | N/A   |
| Other analyses           | 17 | Report other analyses done—eg analyses of subgroups and interactions, and sensitivity analyses                                                                             | 16    |
| <b>Discussion</b>        |    |                                                                                                                                                                            |       |
| Key results              | 18 | Summarise key results with reference to study objectives                                                                                                                   | 14-15 |
| Limitations              | 19 | Discuss limitations of the study, taking into account sources of potential bias or imprecision. Discuss both direction and magnitude of any potential bias                 | 17    |
| Interpretation           | 20 | Give a cautious overall interpretation of results considering objectives, limitations, multiplicity of analyses, results from similar studies, and other relevant evidence | 14-17 |
| Generalisability         | 21 | Discuss the generalisability (external validity) of the study results                                                                                                      | 17    |
| <b>Other information</b> |    |                                                                                                                                                                            |       |
| Funding                  | 22 | Give the source of funding and the role of the funders for the present study and, if applicable, for the original study on which the present article is based              | 1     |

\*Give information separately for exposed and unexposed groups.

**Note:** An Explanation and Elaboration article discusses each checklist item and gives methodological background and published examples of transparent reporting. The STROBE checklist is best used in conjunction with this article (freely available on the Web sites of PLoS Medicine at <http://www.plosmedicine.org/>, Annals of Internal Medicine at <http://www.annals.org/>, and Epidemiology at <http://www.epidem.com/>). Information on the STROBE Initiative is available at [www.strobe-statement.org](http://www.strobe-statement.org).

# BMJ Open

## Reliability and Validity of the Japanese Version of the Ocular Surface Disease Index for Dry Eye Disease

|                                 |                                                                                                                                                                                                                                                                                                                                                                                                                                                                                                                                                                                                                                                                                                                                                                                                                                                                                                                                                                                                                                                                                                                                                                                                                                                                     |
|---------------------------------|---------------------------------------------------------------------------------------------------------------------------------------------------------------------------------------------------------------------------------------------------------------------------------------------------------------------------------------------------------------------------------------------------------------------------------------------------------------------------------------------------------------------------------------------------------------------------------------------------------------------------------------------------------------------------------------------------------------------------------------------------------------------------------------------------------------------------------------------------------------------------------------------------------------------------------------------------------------------------------------------------------------------------------------------------------------------------------------------------------------------------------------------------------------------------------------------------------------------------------------------------------------------|
| Journal:                        | <i>BMJ Open</i>                                                                                                                                                                                                                                                                                                                                                                                                                                                                                                                                                                                                                                                                                                                                                                                                                                                                                                                                                                                                                                                                                                                                                                                                                                                     |
| Manuscript ID                   | bmjopen-2019-033940.R1                                                                                                                                                                                                                                                                                                                                                                                                                                                                                                                                                                                                                                                                                                                                                                                                                                                                                                                                                                                                                                                                                                                                                                                                                                              |
| Article Type:                   | Original research                                                                                                                                                                                                                                                                                                                                                                                                                                                                                                                                                                                                                                                                                                                                                                                                                                                                                                                                                                                                                                                                                                                                                                                                                                                   |
| Date Submitted by the Author:   | 10-Oct-2019                                                                                                                                                                                                                                                                                                                                                                                                                                                                                                                                                                                                                                                                                                                                                                                                                                                                                                                                                                                                                                                                                                                                                                                                                                                         |
| Complete List of Authors:       | Midorikawa-Inomata, Akie; Juntendo University Graduate School of Medicine, Department of Hospital Administration<br>Inomata, Takenori; Juntendo University Faculty of Medicine, Ophthalmology<br>Nojiri, Shuko ; Juntendo University, Clinical Research Support Center<br>Nakamura, Masahiro; Graduate School of Bioengineering, The University of Tokyo, Precision Health, Department of Bioengineering<br>Iwagami, Masao; University of Tsukuba, Department of Health Services Research<br>Keiichi, Fujimoto; Juntendo University Graduate School of Medicine, Department of Ophthalmology<br>Okumura, Yuichi; Juntendo University Graduate School of Medicine, Department of Ophthalmology<br>Iwata, Nanami; Juntendo University Graduate School of Medicine, Department of Ophthalmology<br>Eguchi, Atsuko; Juntendo University Graduate School of Medicine, Department of Hospital Administration<br>Hasegawa, Hitomi; Juntendo University Faculty of Medicine, Ophthalmology<br>Kinouchi, Hikaru; Aoyama Gakuin University, School of Cultural and Creative Studies<br>Murakami, Akira; Juntendo University Faculty of Medicine, Ophthalmology<br>Kobayashi, Hiroyuki; Juntendo University Graduate School of Medicine, Department of Hospital Administration |
| <b>Primary Subject Heading</b>: | Ophthalmology                                                                                                                                                                                                                                                                                                                                                                                                                                                                                                                                                                                                                                                                                                                                                                                                                                                                                                                                                                                                                                                                                                                                                                                                                                                       |
| Secondary Subject Heading:      | Epidemiology                                                                                                                                                                                                                                                                                                                                                                                                                                                                                                                                                                                                                                                                                                                                                                                                                                                                                                                                                                                                                                                                                                                                                                                                                                                        |
| Keywords:                       | dry eye disease, ocular surface disease index, OSDI, reliability, validity                                                                                                                                                                                                                                                                                                                                                                                                                                                                                                                                                                                                                                                                                                                                                                                                                                                                                                                                                                                                                                                                                                                                                                                          |
|                                 |                                                                                                                                                                                                                                                                                                                                                                                                                                                                                                                                                                                                                                                                                                                                                                                                                                                                                                                                                                                                                                                                                                                                                                                                                                                                     |

SCHOLARONE™  
Manuscripts



1  
2  
3  
4  
5 1 Original article—Clinical Science  
6 2

7 3 **Reliability and Validity of the Japanese Version of the**  
8 **Ocular Surface Disease Index for Dry Eye Disease**  
9 4  
10 5

11 6 **Akie Midorikawa-Inomata<sup>1</sup> RN, MPH, Takenori Inomata<sup>2,3,\*</sup> MD, PhD, MBA, Shuko**  
12 **Nojiri<sup>4</sup> MPH, PhD, Masahiro Nakamura<sup>5</sup> MD, PhD, Masao Iwagami<sup>6</sup> MD, MPH, MSc,**  
13 **PhD, Keiichi Fujimoto<sup>7</sup> MD, Yuichi Okumura<sup>7</sup> MD, Nanami Iwata<sup>7</sup>, Atsuko Eguchi<sup>1</sup>,**  
14 **Hitomi Hasegawa<sup>2</sup> MD, Hikaru Kinouchi<sup>8</sup>, Akira Murakami<sup>2,7,‡</sup> MD, PhD, and Hiroyuki**  
15 **Kobayashi<sup>1,‡</sup> MD, PhD.**  
16 9  
17 10

18  
19 11  
20 12 <sup>1</sup>Juntendo University Graduate School of Medicine, Department of Hospital Administration, Tokyo,  
21 13 Japan

22  
23 14 <sup>2</sup>Juntendo University Faculty of Medicine, Department of Ophthalmology, Tokyo, Japan

24  
25 15 <sup>3</sup>Juntendo University Faculty of Medicine, Department of Strategic Operating Room Management and  
26 16 Improvement, Tokyo, Japan

27  
28 17 <sup>4</sup>Juntendo University Faculty of Medicine, Department of Medical Technology Center, Tokyo, Japan

29  
30 18 <sup>5</sup>Precision Health, Department of Bioengineering, Graduate School of Bioengineering, The University of  
31 19 Tokyo, Tokyo, Japan

32  
33 20 <sup>6</sup>University of Tsukuba, Department of Health Services Research, Ibaraki, Japan

34  
35 21 <sup>7</sup>Juntendo University Graduate School of Medicine, Department of Ophthalmology, Tokyo, Japan

36  
37 22 <sup>8</sup>Aoyama Gakuin University, School of Cultural and Creative Studies, Tokyo, Japan

38  
39 23  
40 24 \*Corresponding author:

41  
42 25 Takenori Inomata, MD, PhD, MBA

43  
44 26 3-1-3 Hongo, Bunkyo-ku, Juntendo University Faculty of Medicine, Department of  
45 27 Ophthalmology, Tokyo, 113-0033, Japan.

46  
47 28 Tel: +81-3-3813-3111; Fax: +81-3-3817-0260, E-mail: tinoma@juntendo.ac.jp  
49 29

48  
49 30 ‡These authors are co-last authors.  
50 31

51  
52 32 **Word count: 4163**

53  
54 33 **Declaration of competing/conflicting interests:** There are no conflicts of interest to declare.

55  
56 34 **Funding sources:** This research received no external funding or any specific grant from  
57 35 funding agencies in the public, commercial, or not-for-profit sectors.

1  
2  
3  
4 36 **Data Availability Statement:** The data that support the findings of this study are available from  
5 37 the corresponding author upon reasonable request. The J-OSDI is provided for others to use as  
6 38 Supplemental Figure 1.  
7

8 39  
9

## 10 40 **ABSTRACT**

11  
12 41 **Objectives:** The ocular surface disease index (OSDI) questionnaire is widely used to evaluate  
13 42 subjective symptoms of dry eye disease (DED) as a primary diagnostic criterion. This study  
14 43 aimed to develop a Japanese version of the OSDI (J-OSDI) and assess its reliability and  
15 44 validity.  
16  
17  
18  
19

20 45 **Design and Setting:** Hospital-based cross-sectional observational study.  
21

22 46 **Participants:** A total of 209 patients recruited from the Department of Ophthalmology at  
23 47 Juntendo University Hospital.  
24  
25

26 48 **Methods:** We translated and culturally adapted the OSDI into Japanese. The J-OSDI was then  
27 49 assessed for internal consistency, reliability, and validity. We also evaluated the optimal cut-off  
28 50 value to suspect DED using an area under the receiver operating characteristic curve (AUC)  
29 51 analysis.  
30  
31  
32  
33

34 52 **Primary Outcome Measures:** Internal consistency, test-retest reliability, and discriminant  
35 53 validity of the J-OSDI as well as the optimal cut-off value to suspect DED.  
36  
37

38 54 **Results:** Of the participants, 152 had DED and 57 did not. The J-OSDI total score showed good  
39 55 internal consistency (Cronbach alpha = 0.884), test-retest reliability (interclass correlation  
40 56 coefficient = 0.910), and discriminant validity by known-group comparisons (non-DED, 19.4 ±  
41 57 16.0; DED, 37.7 ± 22.2;  $p < 0.001$ ). Factor validity was used to confirm 3 subscales within the  
42 58 J-OSDI according to the original version of the questionnaire. Concurrent validity was assessed  
43 59 by Pearson correlation analysis, and the J-OSDI total score showed a strong positive correlation  
44 60 with the Dry Eye-Related Quality-of-Life Score ( $\gamma = 0.829$ ). The optimal cut-off value of the  
45 61 J-OSDI total score was 36.3 (AUC = 0.744).  
46  
47  
48  
49  
50  
51  
52  
53  
54

55 62 **Conclusions:** The J-OSDI was developed and validated in terms of reliability and validity as an  
56 63 effective tool for DED assessment and monitoring in the Japanese population.  
57  
58  
59  
60

1  
2  
3  
4 64  
5

6 65 **Keywords:** dry eye disease, J-OSDI, ocular surface disease index, OSDI, reliability, validity  
7  
8

9 66  
10

11 67 **Strengths and limitations of this study:**  
12

13  
14 68 • This study provides the first validation data on the Japanese version of the ocular surface  
15 69 disease index (J-OSDI) questionnaire as the primary evaluation for dry eye disease (DED)  
16 70 diagnosis.

17  
18 71 • We conducted a cross-cultural adaptability thoroughly compared by a committee of experts  
19 72 for conceptual equivalence.

20  
21 73 • This study confirmed the reliability and validity of the J-OSDI in the 209 patients.  
22

23 74 • The main limitation is that this study was conducted at a single university hospital, which  
24 75 may limit the generalizability of the findings.

25  
26 76 • The validated J-OSDI allows cross-country epidemiological comparisons of  
27 77 patient-reported subjective symptoms of DED.  
28  
29 78  
30  
31  
32  
33  
34  
35  
36  
37  
38  
39  
40  
41  
42  
43  
44  
45  
46  
47  
48  
49  
50  
51  
52  
53  
54  
55  
56  
57  
58  
59  
60

## 80 INTRODUCTION

81 The prevalence of dry eye disease (DED) continues to grow due to several  
82 psychosocioeconomic factors, including an increase in digital screen usage time, an aging  
83 population, and stressful social environments.[1, 2] DED can cause ocular surface damage, eye  
84 discomfort, and impaired vision and can also lead to substantial economic problems due to  
85 decreased quality of life and work productivity.[3, 4] Therefore, quantifying the symptoms and  
86 severity of DED is important for the diagnosis, monitoring, and treatment of the condition.[5, 6]

87 Diagnosis of DED can be made using various methods, including tear film breakup time  
88 (TFBUT), ocular surface staining, and osmolarity as a homeostasis marker. Additionally, the  
89 use of a questionnaire to determine if symptoms of DED are present is recommended as a  
90 primary examination method in the DED diagnosis protocol by the TFOS DEWS II Diagnostic  
91 Methodology report and in the 2016 Asia Dry Eye Society (ADES) consensus report.[7, 8]  
92 Although previous research has established a divergence between the subjective symptoms of  
93 DED and clinical severity of the disease,[9-11] questionnaires that can quantitatively measure  
94 the subjective symptoms of DED are indispensable for DED diagnosis and management.

95 The 2016 dry eye diagnostic criteria published by the ADES[8] recommend that DED be  
96 diagnosed according to both subjective symptoms and TFBUT, indicating that subjective  
97 symptoms are now widely recognized as playing an important role in DED. We previously  
98 showed that this change in diagnostic criteria could lead to a 28.0% increase in DED patients in  
99 Japan[2]; thus, the need for effective DED treatments may increase in the future. Both the  
100 Ocular Surface Disease Index (OSDI) and the Dry Eye-Related Quality-of-Life Score  
101 (DEQS)[12] are widely used to assess subjective symptoms of DED in Japan, but the reliability  
102 and validity of the OSDI have not been confirmed in Japan.[13] Determining the reliability and  
103 validity of the Japanese version of the OSDI (J-OSDI) is essential for making epidemiological  
104 and symptomatic comparisons with other countries.[13-16]

1  
2  
3  
4 105 In this study, we developed and evaluated the reliability and validity of the J-OSDI and  
5  
6 106 determined the cut-off value of the J-OSDI total score using the 2016 diagnostic criteria put  
7  
8 107 forth by the ADES.[8]  
9

108

## 109 **MATERIALS AND METHODS**

### 110 **OSDI questionnaire**

111 The OSDI questionnaire contains 12 questions divided into three subscales: ocular symptoms,  
112 vision related function, and environmental triggers.[13] The questionnaire asks patients to rate  
113 each symptom on a 5-point scale according to their frequency, from “all of the time” (score 4) to  
114 “none of the time” (score 0). The OSDI total score and each subscale score are separately  
115 translated to scores of 0–100. According to the OSDI total score, patients are classified as  
116 normal (0–12 points), or as having mild (13–22 points), moderate (23–32 points), or severe  
117 DED (33–100 points).

118

### 119 **Translation of the Japanese version of the Ocular Surface Disease Index**

120 To obtain a scientifically accurate translation and to perform a transcultural validation of  
121 the original version of the questionnaire, a forward-backward procedure was applied to translate  
122 the OSDI (Allegan Inc., Irvine, CA) from English to Japanese following previously established  
123 guidelines.[17-19] First, a forward translation was carried out independently by five bilingual  
124 ophthalmologists to produce a consensus version. A cultural adaptation was conducted to ensure  
125 that the translated questionnaire is easily understandable by Japanese patients. Second, the  
126 consensus version was back-translated into English by two native-English researchers and was  
127 assessed for comprehensibility. Finally, the original translated and back-translated versions  
128 were thoroughly compared by a committee of experts for conceptual equivalence. The J-OSDI  
129 is provided for others to use in Supplemental Figure 1.

130

### 131 **Study design and participants**

1  
2  
3  
4 132 This was a cross-sectional observational study. Adult patients (aged 20 years) who visited  
5  
6 133 the Department of Ophthalmology at Juntendo University Hospital in Tokyo, Japan, between  
7  
8 134 September 2017 to May 2018 were included. Of them, we excluded patients with best-corrected  
9  
10 135 visual acuity (BCVA) values < 20/20 and those with a history of eyelid disorder, ptosis,  
11  
12 136 Parkinson disease, ocular surface surgery, eyelid surgery, hereditary corneal disease, or any  
13  
14 137 other disease that could affect blinking. Written informed consent was obtained from all  
15  
16 138 participants. The study was approved by the Independent Ethics Committee at Juntendo  
17  
18 139 University Hospital (Approval number, 17-088 and 18-141) and adhered to the tenets of the  
19  
20 140 Declaration of Helsinki as revised in Brazil in 2013.  
21  
22

23 141 All patients underwent a complete ophthalmic evaluation for both eyes, including  
24  
25 142 measuring BCVA, intraocular pressure (IOP), and subjective symptoms. Additionally, TFBUT,  
26  
27 143 corneal fluorescein staining (CFS) for kerato-conjunctival vital staining, maximum blink  
28  
29 144 interval (MBI), and Schirmer test I for reflex tear production were assessed for both eyes.  
30  
31 145 TFBUT, CFS, and Schirmer test I values from the worst eye were examined. The mean value of  
32  
33 146 the MBI was used in accordance with a previous study.[20] For each patient, we evaluated the  
34  
35 147 TFBUT, CFS, and MBI before performing Schirmer test I. We diagnosed DED and non-DED  
36  
37 148 using the ADES 2016 diagnostic criteria,[8] which are based on two positive items: the presence  
38  
39 149 of subjective symptoms and decreased TFBUT ( $\leq 5$  seconds).  
40  
41

42 150

#### 43 151 **Environmental conditions**

44  
45  
46 152 The temperature and humidity of the examination room were controlled at 26°C in the  
47  
48 153 summer and 24°C in the winter with 50% relative humidity, according to the Guideline for  
49  
50 154 Design and Operation of Hospital HVAC Systems established by the Healthcare Engineering  
51  
52 155 Association of Japan.[21]  
53

54 156

#### 55 157 **Other instruments for DED diagnosis and management**

56  
57  
58  
59  
60

1  
2  
3  
4 158 Subjective symptoms were evaluated by interviewing subjects with DED. The DEQS  
5  
6 159 questionnaire was administered to subjects in order to assess the severity of dry eye-associated  
7  
8 160 symptoms and the multifaceted effects of DED on daily life.[12] The score derived from this  
9  
10 161 questionnaire is a subjective measurement of DED symptoms, where 0 indicates the best score  
11  
12 162 (no symptoms) and 100 indicates the worst score (maximum symptoms).

13  
14 163 TFBUT was measured using a fluorescein dye according to the standard methodology.[8]  
15  
16 164 Only a small quantity of dye was administered using the wetted fluorescein strip in order to  
17  
18 165 minimize the effect of the dye on tear volume and TFBUT. Each subject was instructed to blink  
19  
20 166 three times after the dye was applied to ensure adequate mixing of the dye and tears. The time  
21  
22 167 interval between the last blink and the appearance of the first dark spot on the cornea was  
23  
24 168 measured with a stopwatch. The mean value of three measurements was used. A cut-off value of  
25  
26 169 TFBUT  $\leq 5$  seconds was used to diagnose DED.[8]

27  
28 170 CFS was graded according to the van Bijsterveld grading system,[22] which divides the  
29  
30 171 ocular surface into three zones: the nasal bulbar conjunctiva, the temporal bulbar conjunctiva,  
31  
32 172 and the cornea. Each zone was evaluated on a scale of 0–3, with 0 indicating no staining and 3  
33  
34 173 indicating confluent staining. The maximum possible score was thus 9.

35  
36 174 The MBI was considered as the length of time that subjects could keep their eyes open  
37  
38 175 before blinking.[20] We calculated the MBI twice by stopwatch under a light microscope  
39  
40 176 without using the light. The MBI was recorded as 30 seconds if the blink interval exceeded 30  
41  
42 177 seconds.

43  
44 178 Schirmer test I was performed without topical anesthesia after all other examinations had  
45  
46 179 been completed. Schirmer's test strips (Ayumi Pharmaceutical Co., Tokyo, Japan) were placed  
47  
48 180 on the outer third of the temporal lower conjunctival fornix for 5 minutes. The strips were then  
49  
50 181 removed, and the length of dampened filter paper (in mm) was recorded.

51  
52  
53  
54  
55 182

56  
57 183 **Statistical analyses**

1  
2  
3  
4 184 To compare general characteristics between DED and non-DED participants, 2-tailed *t* tests  
5  
6 185 were used for continuous variables and  $\chi^2$  tests were used for categorical variables. Pearson rank  
7  
8 186 correlation coefficients were calculated to determine the correlations between J-OSDI, DEQS,  
9  
10 187 TFBUT, MBI, and Schirmer test I results. Receiver operating characteristic (ROC) analysis was  
11  
12 188 used to determine the optimal cut-off value of the J-OSDI total score for suspecting DED. The  
13  
14 189 area under the curve (AUC) was computed using the trapezoidal rule. Data are presented as  
15  
16 190 mean  $\pm$  standard deviation (SD) or proportion (%). Statistical analyses were performed using  
17  
18 191 STATA version 15 (Stata Corp, College Station, TX) and SPSS Statistics v.1.0.0 (IBM Corp,  
19  
20 192 Chicago, IL).  $p < 0.05$  was considered significant.  
21  
22

23 193

#### 24 194 **Reliability**

25  
26  
27 195 The internal consistency of the J-OSDI was assessed using Cronbach's alpha coefficient,  
28  
29 196 with an alpha  $> 0.70$  considered to be acceptable.[23] Test-retest reliability was evaluated by  
30  
31 197 calculating the intraclass correlation coefficient (ICC) values from the first and second entries.  
32  
33 198 An ICC value of  $\geq 0.70$  was considered acceptable for test-retest reliability.[24]  
34  
35

36 199

#### 37 200 **Validity**

38  
39  
40 201 Discriminant validity was evaluated by comparing the non-DED and DED groups. For  
41  
42 202 factor validity, confirmatory factor analysis was conducted by an equamax rotation to determine  
43  
44 203 whether the subscales in the J-OSDI clustered together in the same manner as in the original  
45  
46 204 OSDI. Factors with an eigenvalue  $> 0.90$  were retained. Concurrent validity was assessed by  
47  
48 205 calculating the correlations (Pearson coefficients) between the J-OSDI total score or subscale  
49  
50 206 scores and the DEQS or other clinical results, including TFBUT, CFS, MBI, and Schirmer test I  
51  
52 207 values.  
53

54 208

#### 55 209 **Patient and public involvement**

56  
57  
58 210 No patients were involved in the research design and conception of this research study.  
59  
60



211

212

213 **RESULTS**214 **Participant characteristics**

215 Table 1 shows the general characteristics of the study participants. All subjects responded  
 216 to the questionnaires, completed the examination, and were eligible for the study. Overall, 209  
 217 participants were included. The average age was  $58.9 \pm 15.3$  years, and 83.7% of the  
 218 participants were women. Using the diagnostic criteria put forth by the ADES,[8] 152 and 57  
 219 patients were classified as DED (72.7%) and non-DED (27.3%), respectively. The mean BCVA  
 220 value for both eyes was  $-0.07 \pm 0.02$  logMAR. The mean IOP for both eyes was  $14.1 \pm 2.9$   
 221 mmHg. Both the J-OSDI total score and the DEQS were significantly higher in the DED group  
 222 than in the non-DED group, indicating that DED patients showed a greater rate of subjective  
 223 symptoms. Furthermore, both TFBUT and the MBI were significantly lower in the DED group  
 224 than in the non-DED group. Neither BCVA, IOP, CFS, nor the Schirmer test I results differed  
 225 significantly between DED and non-DED participants.

226

227 **Table 1.** Characteristics of study participants.

|                              | <b>non-DED</b>  | <b>DED</b>      | <b>p value</b> | <b>Total</b>    |
|------------------------------|-----------------|-----------------|----------------|-----------------|
|                              | <b>n = 57</b>   | <b>n = 152</b>  |                | <b>n = 209</b>  |
| Age, year $\pm$ SD           | $61.4 \pm 15.5$ | $57.9 \pm 15.2$ | 0.149          | $58.9 \pm 15.3$ |
| Gender, female (%)           | 48 (84.2)       | 127 (83.6)      | 1.000          | 175 (83.7)      |
| BCVA, logMAR $\pm$ SD        | $-0.1 \pm 0.0$  | $-0.1 \pm 0.0$  | 0.513          | $-0.1 \pm 0.0$  |
| IOP, mmHg $\pm$ SD           | $14.6 \pm 2.9$  | $13.8 \pm 2.7$  | 0.062          | $14.0 \pm 2.8$  |
| Subjective symptoms, yes (%) | 5 (8.8)         | 152 (100)       | ***< 0.001     | 157 (75.1)      |
| J-OSDI, 0–100 $\pm$ SD       | $19.4 \pm 16.0$ | $37.7 \pm 22.2$ | ***< 0.001     | $32.7 \pm 29.7$ |

|                     |             |             |            |             |
|---------------------|-------------|-------------|------------|-------------|
| DEQS, 0–100 ± SD    | 16.0 ± 14.7 | 32.7 ± 21.6 | ***< 0.001 | 28.1 ± 21.3 |
| TFBUT, seconds ± SD | 2.5 ± 2.4   | 1.5 ± 0.8   | ***< 0.001 | 1.7 ± 1.5   |
| CFS, 0–9 ± SD       | 2.8 ± 2.5   | 3.3 ± 2.6   | 0.192      | 3.2 ± 2.6   |
| Schirmer I, mm ± SD | 7.2 ± 8.2   | 5.7 ± 6.2   | 0.162      | 6.1 ± 6.8   |
| MBI, seconds ± SD   | 15.1 ± 8.1  | 10.5 ± 6.3  | ***< 0.001 | 11.7 ± 7.1  |

DED, dry eye disease; BCVA, best-corrected visual acuity; IOP, intraocular pressure; J-OSDI, Japanese version of ocular surface disease index; DEQS, Dry Eye-Related Quality-of-Life Score; TFBUT, tear film breakup time; CFS, corneal fluorescein staining; MBI, maximum blink interval. p values were determined using the Student's t-test (two-tailed) for continuous variables and the chi-square test for categorical variables. \*\*\*p < 0.001.

234

### 235 Reliability

236 We tested the J-OSDI total score and subscale scores for internal consistency and test-retest  
 237 reliability, and the results are shown in Table 2. For internal consistency, the Cronbach's alpha  
 238 coefficient was 0.884 for the J-OSDI total score and 0.788, 0.669, and 0.902 for the ocular  
 239 symptoms, vision-related function, and environmental triggers subscales, respectively.  
 240 Test-retest reliability was evaluated in 173 participants, with a median (interquartile range, IQR)  
 241 period of 119 (81–182) days between the test and retest. The ICC values were 0.910, 0.649,  
 242 0.817, and 0.859 for the J-OSDI total score, ocular symptoms subscale, vision-related function  
 243 subscale, and environmental triggers subscale, respectively.

244 **Table 2.** Reliability for each subscale

|                         |                        | <b>Cronbach <math>\alpha</math></b> | <b>ICC</b>       |
|-------------------------|------------------------|-------------------------------------|------------------|
|                         | <b>Number of items</b> | <b>(n = 209)</b>                    | <b>(n = 173)</b> |
| J-OSDI total score      | 12                     | 0.884                               | 0.910            |
| Ocular symptoms         | 5                      | 0.788                               | 0.649            |
| Vision-related function | 4                      | 0.669                               | 0.817            |

Environmental triggers 3 0.902 0.859

245 J-OSDI, Japanese version of the ocular surface disease index; ICC; intraclass correlation  
246 coefficient.

247

### 248 Discriminant validity

249 Table 3 shows the mean values for the J-OSDI total score, each of the subscale scores, and  
250 each of the component scores. The mean J-OSDI total score was significantly higher in the  
251 DED group than in the non-DED group (DED,  $37.7 \pm 22.2$ ; non-DED,  $19.4 \pm 16.0$ ;  $p < 0.001$ ).  
252 Additionally, all three subscales were significantly higher in the DED group than in the  
253 non-DED group (ocular symptoms: DED,  $34.6 \pm 21.6$ ; non-DED,  $20.9 \pm 17.4$ ;  $p < 0.001$ ;  
254 vision-related function: DED,  $36.5 \pm 27.7$ ; non-DED,  $20.8 \pm 22.0$ ;  $p < 0.001$ ; environmental  
255 triggers: DED,  $45.2 \pm 29.7$ ; non-DED,  $15.5 \pm 19.8$ ;  $p < 0.001$ ). Eleven of the 12 (92%)  
256 component scores were significantly higher in the DED group than in the non-DED group, with  
257 only question 2 showing a non-significant difference.

258 **Table 3.** J-OSDI score for each question.

| Classification, score $\pm$ SD, score | non-DED<br>n = 57 | DED<br>n = 152  | p value       | Total<br>n = 209 |
|---------------------------------------|-------------------|-----------------|---------------|------------------|
| J-OSDI total score, 0–100             | $19.4 \pm 16.0$   | $37.7 \pm 22.2$ | *** $< 0.001$ | $32.7 \pm 22.2$  |
| Ocular symptoms, 0–100                | $20.9 \pm 17.4$   | $34.6 \pm 21.6$ | *** $< 0.001$ | $30.9 \pm 21.4$  |
| 1. Eyes that are sensitive to light?  | $0.8 \pm 0.9$     | $1.5 \pm 1.3$   | *** $< 0.001$ | $1.3 \pm 1.3$    |
| 2. Eyes that feel gritty?             | $0.8 \pm 1.2$     | $1.0 \pm 1.0$   | 0.338         | $1.0 \pm 1.1$    |
| 3. Painful or sore eyes?              | $0.4 \pm 0.7$     | $1.0 \pm 1.0$   | *** $< 0.001$ | $0.8 \pm 1.0$    |
| 4. Blurred vision?                    | $1.1 \pm 1.0$     | $1.6 \pm 1.2$   | **0.002       | $1.5 \pm 1.2$    |
| 5. Poor vision?                       | $1.1 \pm 1.1$     | $1.8 \pm 1.3$   | *** $< 0.001$ | $1.6 \pm 1.3$    |
| Vision-related function               | $20.8 \pm 22.0$   | $36.5 \pm 27.7$ | *** $< 0.001$ | $32.2 \pm 27.2$  |

|                                                      |             |             |            |             |
|------------------------------------------------------|-------------|-------------|------------|-------------|
| 6. Reading?                                          | 0.8 ± 1.1   | 1.6 ± 1.3   | ***< 0.001 | 1.4 ± 1.3   |
| 7. Driving at night?                                 | 0.4 ± 0.6   | 1.1 ± 1.4   | *0.022     | 0.9 ± 1.3   |
| 8. Working with a computer<br>or bank machine (ATM)? | 1.1 ± 1.3   | 1.6 ± 1.4   | *0.030     | 1.5 ± 1.4   |
| 9. Watching TV?                                      | 0.7 ± 1.0   | 1.3 ± 1.2   | **0.002    | 1.1 ± 1.1   |
| Environmental triggers                               | 15.5 ± 19.8 | 45.2 ± 29.7 | ***< 0.001 | 37.1 ± 30.4 |
| 10. Windy conditions?                                | 0.7 ± 0.9   | 1.9 ± 1.4   | ***< 0.001 | 1.5 ± 1.3   |
| 11. Places or areas with low humidity<br>(very dry)? | 0.5 ± 0.8   | 1.6 ± 1.3   | ***< 0.001 | 1.3 ± 1.3   |
| 12. Areas that are air conditioned?                  | 0.6 ± 0.9   | 2.0 ± 1.3   | ***< 0.001 | 1.6 ± 1.3   |

259 DED, Dry eye disease; J-OSDI, Japanese version of ocular surface disease index. p values

260 were determined using the Student's t-test. \*p < 0.05, \*\*p < 0.01, and \*\*\*p < 0.001.

261

## 262 Factor validity

263 Factor validity was assessed by confirmatory factor analysis to determine the subscales. As  
 264 shown in Figure 1, correspondent with the three homogeneous content domains that were  
 265 identified and constructed, three factors were rotated to an equamax solution. These three  
 266 factors accounted for 71.9% of the total variance, and each factor comprised sets of items that  
 267 were interpretable and relevant in content. Factor 1, accounting for 53.0% of the total variance  
 268 and 23.6% of the common variance, comprised items assessing the frequency of ocular  
 269 symptoms (5 items). Factor 2, accounting for 11.1% of the total variance and 22.8% of the  
 270 common variance, comprised items assessing the frequency of vision-related function (4 items).  
 271 Factor 3, accounting for 7.7% of the total variance and 17.7% of the common variance,  
 272 comprised items assessing the frequency of environmental triggers (3 items). All factors were in  
 273 accordance with the subscales in the original version. The factor matrix of each J-OSDI

274 component can be viewed in Supplemental Table 1. All subscales and the total instrument  
275 underwent formal reliability and validity testing.

276

### 277 **Concurrent validity**

278 Table 4 shows the correlations between the J-OSDI total score, subscale scores, and other  
279 clinical items related to DED diagnosis, including DEQS, TFBUT, CFS, Schirmer test I results,  
280 and the MBI. The J-OSDI total score showed a significant strong positive correlation with the  
281 DEQS ( $\gamma = 0.829$ ). Among the clinical items related to DED diagnosis, there was a modest but  
282 significant negative correlation between the J-OSDI total score and MBI ( $\gamma = -0.258$ ). The  
283 subscales were each significantly and positively correlated with the DEQS ( $\gamma = 0.786, 0.702$  and  
284  $0.650$ , respectively), while ocular symptoms and environmental triggers were significantly and  
285 negatively correlated with the MBI ( $\gamma = -0.195$  and  $-0.370$ , respectively).

286

287 **Table 4.** Correlation between the J-OSDI total score and other clinical assessments.

| Clinical Items | OSDI total score |            | Ocular symptoms |            | Vision-related function |            | Environmental triggers |            |
|----------------|------------------|------------|-----------------|------------|-------------------------|------------|------------------------|------------|
|                | $\gamma$         | p value    | $\gamma$        | p value    | $\gamma$                | p value    | $\gamma$               | p value    |
| DEQS           | 0.829            | ***< 0.001 | 0.786           | ***< 0.001 | 0.702                   | ***< 0.001 | -0.650                 | ***< 0.001 |
| TFBUT          | -0.066           | 0.349      | -0.044          | 0.532      | -0.057                  | 0.416      | -0.131                 | 0.063      |
| CFS            | 0.018            | 0.791      | -0.013          | 0.852      | -0.137                  | *0.049     | 0.161                  | *0.022     |
| Schirmer I     | -0.090           | 0.195      | -0.013          | 0.844      | -0.071                  | 0.311      | -0.129                 | 0.067      |
| MBI            | -0.283           | ***< 0.001 | -0.215          | **0.002    | -0.135                  | 0.053      | -0.407                 | ***< 0.001 |

288 J-OSDI, Japanese version of the ocular surface disease index; DEQS, Dry Eye-Related

289 Quality-of-Life Score; TFBUT, tear film breakup time; CFS, corneal fluorescein staining;

290 MBI, maximum blink interval. Pearson rank correlation coefficient was used to determine

1  
2  
3  
4 291 the correlations between the J-OSDI total score and subscale scores and various clinical  
5  
6 292 assessments. \*  $p < 0.05$ , \*\* $p < 0.01$  and \*\*\* $p < 0.001$ .  
7  
8

9 293

#### 10 294 **J-OSDI severity results and cut-off value for detecting DED**

11  
12  
13 295 Figure 2A shows the proportion of DED participants in each severity category as  
14  
15 296 determined by the J-OSDI total score. The clinically diagnosed DED patients were divided  
16  
17 297 according to their J-OSDI scores as follows: 22.0% were categorized as normal, 17.2% were  
18  
19 298 categorized as mild DED, 12.9% were categorized as moderate DED, and 47.8% were  
20  
21 299 categorized as severe DED. Figure 2B shows the proportion of patients who were clinically  
22  
23 300 diagnosed with DED in each severity category determined by the J-OSDI total scores. Overall,  
24  
25 301 47.8% of the patients who were classified as normal by their J-OSDI total score were clinically  
26  
27 302 diagnosed with DED, while 66.7%, 74.0%, and 86.0% of patients classified as mild, moderate,  
28  
29 303 and severe, respectively, were clinically diagnosed with DED. Figure 2C shows the ROC curve  
30  
31 304 of the J-OSDI total score from the non-DED and DED groups, which was used to determine the  
32  
33 305 diagnostic efficacy of the J-OSDI total score. The optimum cut-off value for detecting DED was  
34  
35 306 36.3 points, with an AUC, sensitivity, and specificity of 0.744, 51.3%, and 87.7%, respectively.  
36  
37 307 Supplemental Table 1 shows the details of the J-OSDI total score sensitivity and specificity  
38  
39 308 analysis.  
40  
41  
42  
43  
44

#### 45 310 **DISCUSSION**

46  
47 311 This study developed, and assessed the reliability and validity, of the J-OSDI, which is the  
48  
49 312 Japanese version of OSDI, and determined a cut-off value for detecting DED using the ADES  
50  
51 313 diagnostic criteria of 2016. Our results validate the use of the J-OSDI in Japan and make it  
52  
53 314 possible to compare epidemiological results between Japan and other countries.

54  
55 315 In this study, the J-OSDI total score showed both high internal consistency and test-retest  
56  
57 316 reliability (Table 2). The factor analysis confirmed three subscales within the J-OSDI, ocular  
58  
59  
60

1  
2  
3  
4 317 symptoms, vision-related function, and environmental triggers, in accordance with the subscales  
5  
6 318 in the original English version (Figure 1).[13] The environmental triggers subscale showed good  
7  
8 319 internal consistency and reliability, whereas the other two subscales, ocular symptoms and  
9  
10 320 vision-related function, showed lower internal consistency and reliability compared to  
11  
12 321 environmental triggers. Vision-related function only showed modest internal consistency.  
13  
14 322 Internal consistency denotes whether all items of an instrument measure the same  
15  
16 323 characteristic.[25] In the sensitivity analysis, deleting question item 7 (i.e., night driving)  
17  
18 324 provided the highest ICC value of 0.74 (Supplemental Table 2). This study was conducted in  
19  
20 325 central Tokyo, where the traffic network was developed, and numerous elderly people were  
21  
22 326 included. Therefore, question item 7 on night driving may have affected the internal consistency.  
23  
24 327 This result indicates that the question items included in OSDI need to be adjusted to the  
25  
26 328 changing demands. The ocular symptoms of DED patients have typically varied because of the  
27  
28 329 known fluctuations in the subjective symptoms of DED,[26, 27] thus violating this assumption  
29  
30 330 of reliability.

31  
32  
33  
34 331 The discriminant validity of the J-OSDI was verified from the finding that the J-OSDI total  
35  
36 332 score and subscale scores were significantly higher in the DED group than in the non-DED  
37  
38 333 group (Table 3). Further, the percentage of participants who were clinically diagnosed with  
39  
40 334 DED increased proportionally in each severity category, indicating that the J-OSDI total score  
41  
42 335 can discriminate DED (Figure 2B). Our study also determined that the optimal J-OSDI total  
43  
44 336 score cut-off value for detecting DED according to the ADES criteria was 36.3. One previous  
45  
46 337 study reported an OSDI total score cut-off value of 15.[13] However, the difference between  
47  
48 338 this cut-off value and that of the current study is probably the result of differences in the  
49  
50 339 methods used to clinically diagnose the severity of DED, as the previous study used lissamine  
51  
52 340 green staining, Schirmer test I, and patient perception of ocular symptoms. In contrast, the  
53  
54 341 current study used TFBUT as an essential part of the diagnostic criteria.[7, 8] Supplemental  
55  
56 342 Table 3 shows the sensitivity and specificity of our reported optimal cut-off value and the  
57  
58 343 sensitivity and specificity for the different severity categories: normal (0–12), mild (13–22),  
59  
60

1  
2  
3  
4 344 moderate (23–32), and severe (33–100).[13] Our results suggest that it is necessary to  
5  
6 345 re-evaluate the OSDI total score cut-off values for diagnosis and the severity categories to  
7  
8 346 reflect the changes made to the diagnostic criteria for DED.[7, 8, 28-33]  
9

10 347 Table 4 shows the correlations between the J-OSDI total score and other clinical tests,  
11  
12 348 including DEQS, TFBUT, CFS, MBI, and Schirmer test I. The J-OSDI total score showed a  
13  
14 349 strong positive correlation with the DEQS. Because the DEQS has been validated in Japan,[12]  
15  
16 350 this result supports the use of the J-OSDI as a valid method of quantifying subjective symptoms.  
17  
18 351 In contrast, the respective correlations between the J-OSDI total score and TFBUT, CFS, and  
19  
20 352 Schirmer I were relatively low. This is consistent with previous studies that reported low  
21  
22 353 correlations and high divergence between subjective symptoms assessed by questionnaires and  
23  
24 354 clinical tools,[2, 24, 30] underscoring the importance of combining knowledge about subjective  
25  
26 355 symptoms and clinical tools in order to effectively evaluate and monitor DED. Our group[20]  
27  
28 356 has proposed the MBI as a simple self-check screening test for DED because it is highly  
29  
30 357 correlated with subjective symptoms compared with other dry eye items (Table 4). Because of  
31  
32 358 the divergence between the subjective and clinical symptoms of DED,[2] it is necessary to  
33  
34 359 perform multilateral evaluations using not only the OSDI total scores but also the subscales and  
35  
36 360 each component. In the present study, we assessed the respective relationship between each  
37  
38 361 subscale and various clinical tools for DED examination and found that the ocular symptoms  
39  
40 362 and environmental trigger subscales were negatively correlated with MBI. We recently reported  
41  
42 363 that the MBI is also significantly associated with TFBUT and CFS.[20] Our previous results and  
43  
44 364 those of this study suggest that the MBI reflects both TFBUT and CFS results, possibly  
45  
46 365 explaining its negative correlation with the ocular symptoms and environmental triggers  
47  
48 366 subscale scores of the J-OSDI.  
49  
50  
51

52 367 This study has several limitations. First, it was conducted at a single university hospital in  
53  
54 368 Japan, possibly introducing selection bias into our sample. Second, under the simplified ADES  
55  
56 369 diagnostic criteria, those with low TFBUTs can still be classified as non-DED due to lack of  
57  
58 370 subjective symptoms; thus, our non-DED group showed a low TFBUT. Third, the test-retest  
59  
60



1  
2  
3  
4 371 method that we used to confirm reliability introduced recall bias due to the required length of  
5  
6 372 the test-retest period between 2 days to 2 weeks.[34]. Next, we did not account for differences  
7  
8 373 in variables such as socioeconomic status or education level, possibly affecting the responses.  
9  
10 374 Finally, this study was designed to investigate the J-OSDI as a primary evaluation and  
11  
12 375 monitoring method for DED. Thus, rose bengal stain scores, tear osmolality, meibomian gland  
13  
14 376 dysfunction assessments, and corneal sensations were not applied in this study. Despite these  
15  
16 377 limitations, we verified the reliability and validity of the J-OSDI for DED assessment and  
17  
18 378 monitoring in Japan.

19  
20  
21 379 In summary, we developed and validated the J-OSDI by assessing its reliability and  
22  
23 380 validity. We report that a J-OSDI score of 36.3 is the optimal cut-off value for suspecting DED  
24  
25 381 under the 2016 ADES criteria. We believe that the J-OSDI will be useful for primary  
26  
27 382 assessment and monitoring of DED in routine clinical practice and in remote diagnosis.

28  
29  
30  
31 383

32  
33 384 **Acknowledgments:** The authors thank the nurses and orthoptists of the Department of  
34  
35 385 Ophthalmology at the Juntendo University Hospital for collecting the data for DED diagnosis.

36  
37  
38 386 **Author Contributions:**

39  
40 387 A.MI.: Performance of the research, data collection, data analysis, and writing of the paper; T.I.:  
41  
42 388 Performance of the research, research design, data analysis, and writing of the paper; S.N.:  
43  
44 389 Research design, data analysis; M.N.: Data analysis; M.I.: Research design, data analysis; K.F.:  
45  
46 390 Data collection, data analysis; Y.O.: Data collection, data analysis; N.I.: Data collection, data  
47  
48 391 analysis; A. E.: Data collection, data analysis; H.H.: Data collection, data analysis; H.K.:  
49  
50 392 Performance of the research; A.M.: Research design, writing of the paper; H.K.: Research  
51  
52 393 design, writing of the paper.

53  
54  
55  
56 394 **References**

- 1 Stapleton F, Alves M, Bunya VY, et al. TFOS DEWS II Epidemiology Report. *Ocul Surf* 2017;15:334-65.
- 2 Inomata T, Shiang T, Iwagami M, et al. Changes in Distribution of Dry Eye Disease by the New 2016 Diagnostic Criteria from the Asia Dry Eye Society. *Sci Rep* 2018;8:1918.
- 3 Yu J, Asche CV, Fairchild CJ. The economic burden of dry eye disease in the United States: a decision tree analysis. *Cornea* 2011;30:379-87.
- 4 Uchino M, Uchino Y, Dogru M, et al. Dry eye disease and work productivity loss in visual display users: the Osaka study. *Am J Ophthalmol* 2014;157:294-300.
- 5 Inomata T, Nakamura M, Iwagami M, et al. Risk Factors for Severe Dry Eye Disease: Crowdsourced Research Using DryEyeRhythm. *Ophthalmology* 2019;126:766-68.
- 6 Heidari M, Noorzadeh F, Wu K, et al. Dry Eye Disease: Emerging Approaches to Disease Analysis and Therapy. *J Clin Med* 2019;8
- 7 Wolffsohn JS, Arita R, Chalmers R, et al. TFOS DEWS II Diagnostic Methodology report. *Ocul Surf* 2017;15:539-74.
- 8 Tsubota K, Yokoi N, Shimazaki J, et al. New Perspectives on Dry Eye Definition and Diagnosis: A Consensus Report by the Asia Dry Eye Society. *Ocul Surf* 2017;15:65-76.
- 9 Bourcier T, Acosta MC, Borderie V, et al. Decreased corneal sensitivity in patients with dry eye. *Invest Ophthalmol Vis Sci* 2005;46:2341-5.
- 10 Hay EM, Thomas E, Pal B, et al. Weak association between subjective symptoms or and objective testing for dry eyes and dry mouth: results from a population based study. *Ann Rheum Dis* 1998;57:20-4.
- 11 Xu KP, Yagi Y, Tsubota K. Decrease in corneal sensitivity and change in tear function in dry eye. *Cornea* 1996;15:235-9.
- 12 Sakane Y, Yamaguchi M, Yokoi N, et al. Development and validation of the Dry Eye-Related Quality-of-Life Score questionnaire. *JAMA Ophthalmol* 2013;131:1331-8.
- 13 Schiffman RM, Christianson MD, Jacobsen G, et al. Reliability and validity of the Ocular Surface Disease Index. *Arch Ophthalmol* 2000;118:615-21.
- 14 Pakdel F, Gohari MR, Jazayeri AS, et al. Validation of Farsi Translation of the Ocular Surface Disease Index. *J Ophthalmic Vis Res* 2017;12:301-04.
- 15 Zheng B, Liu XJ, Sun YF, et al. Development and validation of the Chinese version of dry eye related quality of life scale. *Health Qual Life Outcomes* 2017;15:145.
- 16 Santo RM, Ribeiro-Ferreira F, Alves MR, et al. Enhancing the cross-cultural adaptation and validation process: linguistic and psychometric testing of the Brazilian-Portuguese version of a self-report measure for dry eye. *J Clin Epidemiol* 2015;68:370-8.
- 17 Guillemin F, Bombardier C, Beaton D. Cross-cultural adaptation of health-related quality of life measures: literature review and proposed guidelines. *J Clin Epidemiol* 1993;46:1417-32.
- 18 Beaton DE, Bombardier C, Guillemin F, et al. Guidelines for the process of cross-cultural adaptation of self-report measures. *Spine (Phila Pa 1976)* 2000;25:3186-91.
- 19 Castro JS, Selegatto IB, Castro RS, et al. Translation and validation of the Portuguese version of a dry eye disease symptom questionnaire. *Arq Bras Oftalmol* 2017;80:14-16.

- 1  
2  
3  
4 435 20. Inomata T, Iwagami M, Hiratsuka Y, et al. Maximum blink interval is associated with tear film  
5 436 breakup time: A new simple, screening test for dry eye disease. *Sci Rep* 2018;8:13443.  
6  
7 437 21. Healthcare Engineering Association of Japan Standard Working Group. The Guideline for Design and  
8 438 Operation of Hospital HVAC Systems. 2013  
9  
10 439 22. van Bijsterveld OP. Diagnostic tests in the Sicca syndrome. *Arch Ophthalmol* 1969;82:10-4.  
11 440 23. Cronbach. LJ. Coefficient alpha and the internal structure of tests. *Psychometrika* 1951;16:297-334.  
12  
13 441 24. Deyo RA, Diehr P, Patrick DL. Reproducibility and responsiveness of health status measures.  
14 442 Statistics and strategies for evaluation. *Control Clin Trials* 1991;12:142S-58S.  
15 443 25. Streiner DL. Starting at the beginning: an introduction to coefficient alpha and internal consistency. *J*  
16 444 *Pers Assess* 2003;80:99-103.  
17  
18 445 26. Nepp J, Wirth M. Fluctuations of Corneal Sensitivity in Dry Eye Syndromes--A Longitudinal Pilot  
19 446 Study. *Cornea* 2015;34:1221-6.  
20  
21 447 27. Alves M, Reinach PS, Paula JS, et al. Comparison of diagnostic tests in distinct well-defined  
22 448 conditions related to dry eye disease. *PloS one* 2014;9:e97921.  
23  
24 449 28. Schirmer O. Studien zur physiologie und pathologie der tranenabsonderung und tranenabfuhr. *Graefes*  
25 450 *Arch Clin Exp Ophthalmol* 1903;56:197-291.  
26 451 29. Shimazaki J. Definition and criteria of dry eye. *Ganka* 1995;37:765-70.  
27 452 30. Lemp MA. Report of the National Eye Institute/Industry workshop on Clinical Trials in Dry Eyes.  
28 453 *CLAO J* 1995;21:221-32.  
29  
30 454 31. The definition and classification of dry eye disease: report of the Definition and Classification  
31 455 Subcommittee of the International Dry Eye WorkShop (2007). *Ocul Surf* 2007;5:75-92.  
32  
33 456 32. Shimazaki J. TK, Kinoshita S., Ohashi Y. Definition and diagnosis of dry eye 2006. *Atarashii Ganka*  
34 457 2007;24:181-84.  
35  
36 458 33. AAO Cornea/External Disease PPP Panel HCfQEC. Dry Eye Syndrome 2013 [Available from:  
37 459 <https://www.aao.org/preferred-practice-pattern/dry-eye-syndrome-ppp--2013> accessed  
38 460 December 30 2016.  
39  
40 461 34. Marx RG, Menezes A, Horovitz L, et al. A comparison of two time intervals for test-retest reliability  
41 462 of health status instruments. *Journal of Clinical Epidemiology* 2003;56:730-35.  
42 463  
43  
44 464

465 **Figure 1. Three subscales of the J-OSDI as determined by factor analysis.** The  
466 existence of 3 clusters that were used as subscales are shown. These were in accordance  
467 with the subscales that are used in the original version of the OSDI: vision-related function  
468 (components 1-5), ocular symptoms (components 6-9), and environmental triggers  
469 (components 10-12).

470

1  
2  
3  
4 471 **Figure 2. Clinical utility of the J-OSDI for evaluating dry eye disease (DED).** (a) The  
5  
6 472 proportion of patients in each DED severity category as determined by the J-OSDI total  
7  
8 473 score. (b) The proportion of patients who were clinically diagnosed with DED by category  
9  
10 474 of severity according to the J-OSDI total score. (c) The receiver operator characteristic  
11  
12 475 (ROC) curve for the diagnosis of DED determined by the Asia Dry Eye Society 2016  
13  
14 476 criteria using the J-OSDI. The area under the ROC curve (AUC) is 0.744.  
15  
16  
17

477

#### 478 **Supplementary Information**

479 **Supplemental Figure 1: The Japanese version of Ocular Disease Index (J-OSDI).** The J-OSDI questionnaire  
480 contains 12 questions divided into three subscales.

481 **Supplemental Table 1: Factor matrix of each J-OSDI question.** Results of factor analysis of each J-OSDI  
482 question. All three subscales were in accordance with the subscales in the original version.

483 **Supplemental Table 2: Sensitivity analysis of the internal consistency of the vision-related function score.** The  
484 total Cronbach's alpha was calculated by removing one item from a certain domain of the subscale of vision-related  
485 function.

486 **Supplemental Table 3: J-OSDI total score sensitivity and specificity analysis results.** Full results of the  
487 sensitivity and specificity analysis. Our reported cut-off value for suspecting dry eye disease was 36.3.

1  
2  
3  
4  
5  
6  
7  
8  
9  
10  
11  
12  
13  
14  
15  
16  
17  
18  
19  
20  
21  
22  
23  
24  
25  
26  
27  
28  
29  
30  
31  
32  
33  
34  
35  
36  
37  
38  
39  
40  
41  
42  
43  
44  
45  
46  
47  
48  
49  
50  
51  
52  
53  
54  
55  
56  
57  
58  
59  
60

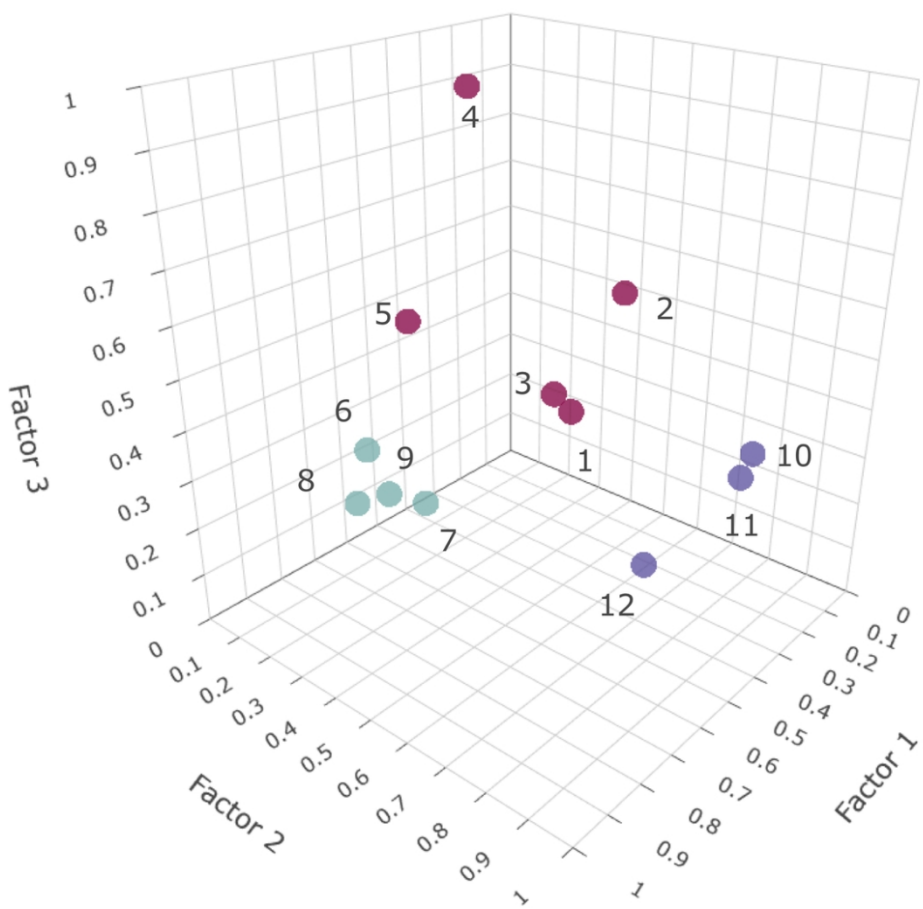

Figure 1

99x97mm (300 x 300 DPI)

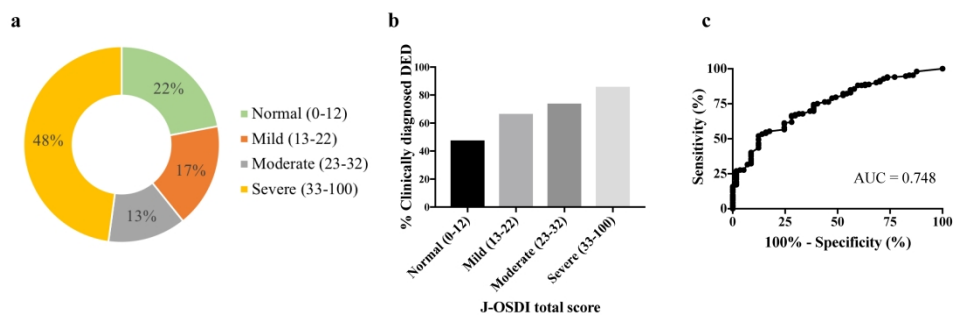

Figure 2

## ドライアイ質問紙票 (J-OSDI)

氏名： \_\_\_\_\_ ID： \_\_\_\_\_

ご記入日 \_\_\_\_\_ 年 \_\_\_\_\_ 月 \_\_\_\_\_ 日

下記の設問のあてはまる数字に○をつけてください。

| この一週間で下記の症状をどのくらい感じましたか？ | いつも | ほとんど | 半々 | ときどき | 全くない |
|--------------------------|-----|------|----|------|------|
| 1. まぶしさ                  | 4   | 3    | 2  | 1    | 0    |
| 2. 目がゴロゴロする              | 4   | 3    | 2  | 1    | 0    |
| 3. 目の痛み                  | 4   | 3    | 2  | 1    | 0    |
| 4. 目のかすみ                 | 4   | 3    | 2  | 1    | 0    |
| 5. 見づらさ                  | 4   | 3    | 2  | 1    | 0    |

| この一週間で目の症状が原因で、下記の行動はどのくらい制限されましたか？ | いつも | ほとんど | 半々 | ときどき | 全くない | 該当せず |
|-------------------------------------|-----|------|----|------|------|------|
| 6. 読書                               | 4   | 3    | 2  | 1    | 0    | —    |
| 7. 夜間の運転                            | 4   | 3    | 2  | 1    | 0    | —    |
| 8. パソコンや銀行ATMの使用                    | 4   | 3    | 2  | 1    | 0    | —    |
| 9. テレビ鑑賞                            | 4   | 3    | 2  | 1    | 0    | —    |

| この一週間で次の環境において、目の不快感を感じましたか？ | いつも | ほとんど | 半々 | ときどき | 全くない | 該当せず |
|------------------------------|-----|------|----|------|------|------|
| 10. 風が強いとき                   | 4   | 3    | 2  | 1    | 0    | —    |
| 11. 湿度が低い(乾燥している)場所          | 4   | 3    | 2  | 1    | 0    | —    |
| 12. エアコンの効いている場所             | 4   | 3    | 2  | 1    | 0    | —    |

## Supplemental Information

### From: Reliability and Validity of the Japanese version of the Ocular Surface Disease Index for Dry Eye Disease

Akie Midorikawa-Inomata RN, MPH, Takenori Inomata MD, PhD, MBA, Soko Nojiri, MPH, Masahiro Nakamura MD, PhD, Masao Iwagami MD, MPH, MSc, PhD, Keiichi Fujimoto MD, Yuichi Okumura MD, Nanami Iwata, Atsuko Eguchi, Hitomi Hasegawa MD, Hikaru Kinouchi, Akira Murakami MD, PhD, and Hiroyuki Kobayashi MD, PhD.

**Table S1: Factor matrix of each J-OSDI question**

| Components | Factor |       |       |
|------------|--------|-------|-------|
|            | 1      | 2     | 3     |
| 1          | 0.352  | 0.474 | 0.361 |
| 2          | 0.055  | 0.393 | 0.504 |
| 3          | 0.256  | 0.349 | 0.331 |
| 4          | 0.335  | 0.167 | 0.927 |
| 5          | 0.632  | 0.269 | 0.573 |
| 6          | 0.706  | 0.208 | 0.323 |
| 7          | 0.576  | 0.246 | 0.171 |
| 8          | 0.710  | 0.172 | 0.198 |
| 9          | 0.719  | 0.283 | 0.260 |
| 10         | 0.156  | 0.815 | 0.307 |
| 11         | 0.239  | 0.837 | 0.295 |
| 12         | 0.441  | 0.742 | 0.159 |

J-OSDI, Japanese version of the Ocular Surface Disease Index.

Extraction Method: Maximum likelihood method; Rotation Method: Equamax with Kaiser normalization



**Table S2: Sensitivity analysis of the internal consistency of the vision related function score**

|                                                            | Cronbach $\alpha$ |
|------------------------------------------------------------|-------------------|
| Vision-related function                                    | 0.669             |
| excluded 6. Reading?                                       | 0.529             |
| excluded 7. Driving at night?                              | 0.746             |
| excluded 8. Working with a computer or bank machine (ATM)? | 0.508             |
| excluded 9. Watching TV?                                   | 0.497             |

**Table S3: J-OSDI total score sensitivity and specificity analysis results**

| J-OSDI total score | Sensitivity (%) | Specificity (%) |
|--------------------|-----------------|-----------------|
| > 1.05             | 98.03           | 12.28           |
| > 2.2              | 95.39           | 14.04           |
| > 2.4              | 95.39           | 15.79           |
| > 3.35             | 94.74           | 17.54           |
| > 4.9              | 94.08           | 22.81           |
| > 5.95             | 94.08           | 26.32           |
| > 6.55             | 92.76           | 28.07           |
| > 6.95             | 91.45           | 29.82           |
| > 7.3              | 90.79           | 29.82           |
| > 7.9              | 90.13           | 31.58           |
| > 9.15             | 88.82           | 35.09           |
| > 10.2             | 88.82           | 36.84           |
| > 10.9             | 88.16           | 38.6            |
| > 11.95            | 88.16           | 40.35           |
| > 13.05            | 84.87           | 42.11           |
| > 14.1             | 84.21           | 43.86           |
| > 14.8             | 82.24           | 43.86           |
| > 15.3             | 81.58           | 45.61           |
| > 15.75            | 81.58           | 47.37           |
| > 16.3             | 80.26           | 47.37           |
| > 17.45            | 78.95           | 50.88           |
| > 18.5             | 78.29           | 52.63           |
| > 19.1             | 75.66           | 54.39           |
| > 19.7             | 75.66           | 56.14           |

|         |       |       |
|---------|-------|-------|
| > 20.25 | 74.34 | 59.65 |
| > 20.65 | 73.68 | 61.4  |
| > 21.35 | 72.37 | 61.4  |
| > 22.05 | 71.05 | 61.4  |
| > 22.35 | 70.39 | 61.4  |
| > 22.6  | 69.08 | 61.4  |
| > 23.85 | 69.08 | 63.16 |
| > 26.15 | 67.11 | 66.67 |
| > 27.4  | 67.11 | 68.42 |
| > 27.8  | 66.45 | 70.18 |
| > 28.65 | 65.79 | 70.18 |
| > 29.35 | 65.13 | 71.93 |
| > 29.75 | 61.18 | 71.93 |
| > 30.3  | 60.53 | 75.44 |
| > 30.95 | 59.87 | 75.44 |
| > 31.55 | 57.24 | 75.44 |
| > 32.55 | 55.92 | 75.44 |
| > 33.7  | 54.61 | 82.46 |
| > 34.55 | 53.95 | 84.21 |
| > 35.2  | 53.29 | 84.21 |
| > 35.75 | 52.63 | 85.96 |
| > 36.25 | 51.32 | 87.72 |
| > 36.95 | 48.68 | 87.72 |
| > 38.55 | 46.05 | 87.72 |
| > 39.8  | 44.74 | 87.72 |
| > 40.85 | 42.76 | 87.72 |
| > 42.1  | 39.47 | 91.23 |

|         |       |       |
|---------|-------|-------|
| > 42.85 | 38.82 | 91.23 |
| > 43.5  | 38.16 | 91.23 |
| > 44.4  | 36.84 | 91.23 |
| > 45.4  | 34.87 | 91.23 |
| > 46.5  | 33.55 | 91.23 |
| > 47.35 | 32.89 | 91.23 |
| > 47.6  | 32.24 | 91.23 |
| > 47.8  | 31.58 | 91.23 |
| > 48.95 | 30.92 | 92.98 |
| > 51.05 | 27.63 | 94.74 |
| > 52.2  | 26.97 | 98.25 |
| > 52.4  | 25.66 | 98.25 |
| > 53.35 | 25    | 98.25 |
| > 54.35 | 23.03 | 98.25 |
| > 55.4  | 21.71 | 98.25 |
| > 56.55 | 21.05 | 98.25 |
| > 57.15 | 20.39 | 98.25 |
| > 57.9  | 18.42 | 98.25 |
| > 58.7  | 17.11 | 98.25 |
| > 59.75 | 16.45 | 98.25 |
| > 61.45 | 15.79 | 100   |
| > 63.05 | 15.13 | 100   |
| > 63.75 | 13.82 | 100   |
| > 64.25 | 13.16 | 100   |
| > 66.05 | 11.84 | 100   |
| > 67.7  | 9.868 | 100   |
| > 68.35 | 9.211 | 100   |

|         |       |     |
|---------|-------|-----|
| > 69.65 | 8.553 | 100 |
| > 70.65 | 7.895 | 100 |
| > 71.85 | 7.237 | 100 |
| > 75    | 6.579 | 100 |
| > 77.2  | 5.921 | 100 |
| > 78.25 | 4.605 | 100 |
| > 82.1  | 3.947 | 100 |
| > 85.7  | 2.632 | 100 |
| > 87.5  | 1.974 | 100 |
| > 89.3  | 1.316 | 100 |

J-OSDI, Japanese version of the Ocular Surface Disease Index

STROBE Statement—Checklist of items that should be included in reports of *cross-sectional studies*

|                              | Item No                                                                            | Recommendation                                                                                                                                                                                               | Page No |
|------------------------------|------------------------------------------------------------------------------------|--------------------------------------------------------------------------------------------------------------------------------------------------------------------------------------------------------------|---------|
| <b>Title and abstract</b>    | 1                                                                                  | (a) Indicate the study's design with a commonly used term in the title or the abstract                                                                                                                       | 1,2     |
|                              |                                                                                    | (b) Provide in the abstract an informative and balanced summary of what was done and what was found                                                                                                          | 1,2     |
| <b>Introduction</b>          |                                                                                    |                                                                                                                                                                                                              |         |
| Background/rationale         | 2                                                                                  | Explain the scientific background and rationale for the investigation being reported                                                                                                                         | 4       |
| Objectives                   | 3                                                                                  | State specific objectives, including any prespecified hypotheses                                                                                                                                             | 4       |
| <b>Methods</b>               |                                                                                    |                                                                                                                                                                                                              |         |
| Study design                 | 4                                                                                  | Present key elements of study design early in the paper                                                                                                                                                      | 5-8     |
| Setting                      | 5                                                                                  | Describe the setting, locations, and relevant dates, including periods of recruitment, exposure, follow-up, and data collection                                                                              | 5-6     |
| Participants                 | 6                                                                                  | (a) Give the eligibility criteria, and the sources and methods of selection of participants                                                                                                                  | 5       |
| Variables                    | 7                                                                                  | Clearly define all outcomes, exposures, predictors, potential confounders, and effect modifiers. Give diagnostic criteria, if applicable                                                                     | 6-8     |
| Data sources/<br>measurement | 8*                                                                                 | For each variable of interest, give sources of data and details of methods of assessment (measurement). Describe comparability of assessment methods if there is more than one group                         | 6-8     |
| Bias                         | 9                                                                                  | Describe any efforts to address potential sources of bias                                                                                                                                                    | 17      |
| Study size                   | 10                                                                                 | Explain how the study size was arrived at                                                                                                                                                                    | 9       |
| Quantitative variables       | 11                                                                                 | Explain how quantitative variables were handled in the analyses. If applicable, describe which groupings were chosen and why                                                                                 | 6-8     |
| Statistical methods          | 12                                                                                 | (a) Describe all statistical methods, including those used to control for confounding                                                                                                                        | 8       |
|                              |                                                                                    | (b) Describe any methods used to examine subgroups and interactions                                                                                                                                          | 8       |
|                              | (c) Explain how missing data were addressed                                        | 8                                                                                                                                                                                                            |         |
|                              | (d) If applicable, describe analytical methods taking account of sampling strategy | N/A                                                                                                                                                                                                          |         |
|                              | (e) Describe any sensitivity analyses                                              | N/A                                                                                                                                                                                                          |         |
| <b>Results</b>               |                                                                                    |                                                                                                                                                                                                              |         |
| Participants                 | 13*                                                                                | (a) Report numbers of individuals at each stage of study—eg numbers potentially eligible, examined for eligibility, confirmed eligible, included in the study, completing follow-up, and analysed            | 9       |
|                              |                                                                                    | (b) Give reasons for non-participation at each stage                                                                                                                                                         | 9       |
|                              |                                                                                    | (c) Consider use of a flow diagram                                                                                                                                                                           | N/A     |
| Descriptive data             | 14*                                                                                | (a) Give characteristics of study participants (eg demographic, clinical, social) and information on exposures and potential confounders                                                                     | 9, 10   |
|                              |                                                                                    | (b) Indicate number of participants with missing data for each variable of interest                                                                                                                          | 9       |
| Outcome data                 | 15*                                                                                | Report numbers of outcome events or summary measures                                                                                                                                                         | 9-11    |
| Main results                 | 16                                                                                 | (a) Give unadjusted estimates and, if applicable, confounder-adjusted estimates and their precision (eg, 95% confidence interval). Make clear which confounders were adjusted for and why they were included | N/A     |

|                          |    |                                                                                                                                                                            |       |
|--------------------------|----|----------------------------------------------------------------------------------------------------------------------------------------------------------------------------|-------|
|                          |    | (b) Report category boundaries when continuous variables were categorized                                                                                                  | 5     |
|                          |    | (c) If relevant, consider translating estimates of relative risk into absolute risk for a meaningful time period                                                           | N/A   |
| Other analyses           | 17 | Report other analyses done—eg analyses of subgroups and interactions, and sensitivity analyses                                                                             | 16    |
| <b>Discussion</b>        |    |                                                                                                                                                                            |       |
| Key results              | 18 | Summarise key results with reference to study objectives                                                                                                                   | 14-15 |
| Limitations              | 19 | Discuss limitations of the study, taking into account sources of potential bias or imprecision. Discuss both direction and magnitude of any potential bias                 | 17    |
| Interpretation           | 20 | Give a cautious overall interpretation of results considering objectives, limitations, multiplicity of analyses, results from similar studies, and other relevant evidence | 14-17 |
| Generalisability         | 21 | Discuss the generalisability (external validity) of the study results                                                                                                      | 17    |
| <b>Other information</b> |    |                                                                                                                                                                            |       |
| Funding                  | 22 | Give the source of funding and the role of the funders for the present study and, if applicable, for the original study on which the present article is based              | 1     |

\*Give information separately for exposed and unexposed groups.

**Note:** An Explanation and Elaboration article discusses each checklist item and gives methodological background and published examples of transparent reporting. The STROBE checklist is best used in conjunction with this article (freely available on the Web sites of PLoS Medicine at <http://www.plosmedicine.org/>, Annals of Internal Medicine at <http://www.annals.org/>, and Epidemiology at <http://www.epidem.com/>). Information on the STROBE Initiative is available at [www.strobe-statement.org](http://www.strobe-statement.org).
