# Supplementary material for: Reliability and validity of the Japanese version of the Ocular Surface Disease Index for dry eye disease
Source: PubMed Central journal article supplement — BMJ Open. 2019 Nov 25;9(11):e033940. doi: 10.1136/bmjopen-2019-033940 (PMC6886996; doi:10.1136/bmjopen-2019-033940), 2019-11-25
Supplement: bmjopen-2019-033940supp001.pdf [file bmjopen-2019-033940supp001.pdf]

Japanese version of Ocular Surface Disease Index (J-OSDI)

## ドライアイ質問紙票 (J-OSDI)

氏名： \_\_\_\_\_ ID： \_\_\_\_\_

ご記入日 \_\_\_\_\_ 年 \_\_\_\_\_ 月 \_\_\_\_\_ 日

下記の設問のあてはまる数字に○をつけてください。

| この一週間で下記の症状をどのくらい感じましたか？ | いつも | ほとんど | 半々 | ときどき | 全くない |
|--------------------------|-----|------|----|------|------|
| 1. まぶしさ                  | 4   | 3    | 2  | 1    | 0    |
| 2. 目がゴロゴロする              | 4   | 3    | 2  | 1    | 0    |
| 3. 目の痛み                  | 4   | 3    | 2  | 1    | 0    |
| 4. 目のかすみ                 | 4   | 3    | 2  | 1    | 0    |
| 5. 見づらさ                  | 4   | 3    | 2  | 1    | 0    |

| この一週間で目の症状が原因で、下記の行動はどのくらい制限されましたか？ | いつも | ほとんど | 半々 | ときどき | 全くない | 該当せず |
|-------------------------------------|-----|------|----|------|------|------|
| 6. 読書                               | 4   | 3    | 2  | 1    | 0    | —    |
| 7. 夜間の運転                            | 4   | 3    | 2  | 1    | 0    | —    |
| 8. パソコンや銀行ATMの使用                    | 4   | 3    | 2  | 1    | 0    | —    |
| 9. テレビ鑑賞                            | 4   | 3    | 2  | 1    | 0    | —    |

| この一週間で次の環境において、目の不快感を感じましたか？ | いつも | ほとんど | 半々 | ときどき | 全くない | 該当せず |
|------------------------------|-----|------|----|------|------|------|
| 10. 風が強いとき                   | 4   | 3    | 2  | 1    | 0    | —    |
| 11. 湿度が低い(乾燥している)場所          | 4   | 3    | 2  | 1    | 0    | —    |
| 12. エアコンの効いている場所             | 4   | 3    | 2  | 1    | 0    | —    |
