# Supplementary material for: Reliability and validity of the Japanese version of the Ocular Surface Disease Index for dry eye disease
Source: PubMed Central journal article supplement — BMJ Open. 2019 Nov 25;9(11):e033940. doi: 10.1136/bmjopen-2019-033940 (PMC6886996; doi:10.1136/bmjopen-2019-033940), 2019-11-25
Supplement: bmjopen-2019-033940supp002.pdf [file bmjopen-2019-033940supp002.pdf]

## Supplemental Information

### From: Reliability and Validity of the Japanese version of the Ocular Surface Disease Index for Dry Eye Disease

Akie Midorikawa-Inomata RN, MPH, Takenori Inomata MD, PhD, MBA, Soko Nojiri, MPH, Masahiro Nakamura MD, PhD, Masao Iwagami MD, MPH, MSc, PhD, Keiichi Fujimoto MD, Yuichi Okumura MD, Nanami Iwata, Atsuko Eguchi, Hitomi Hasegawa MD, Hikaru Kinouchi, Akira Murakami MD, PhD, and Hiroyuki Kobayashi MD, PhD.

**Table S1: Factor matrix of each J-OSDI question**

| Components | Factor |       |       |
|------------|--------|-------|-------|
|            | 1      | 2     | 3     |
| 1          | 0.352  | 0.474 | 0.361 |
| 2          | 0.055  | 0.393 | 0.504 |
| 3          | 0.256  | 0.349 | 0.331 |
| 4          | 0.335  | 0.167 | 0.927 |
| 5          | 0.632  | 0.269 | 0.573 |
| 6          | 0.706  | 0.208 | 0.323 |
| 7          | 0.576  | 0.246 | 0.171 |
| 8          | 0.710  | 0.172 | 0.198 |
| 9          | 0.719  | 0.283 | 0.260 |
| 10         | 0.156  | 0.815 | 0.307 |
| 11         | 0.239  | 0.837 | 0.295 |
| 12         | 0.441  | 0.742 | 0.159 |

J-OSDI, Japanese version of the Ocular Surface Disease Index.

Extraction Method: Maximum likelihood method; Rotation Method: Equamax with Kaiser normalization

**Table S2: Sensitivity analysis of the internal consistency of the vision related function score**

|                                                            | Cronbach $\alpha$ |
|------------------------------------------------------------|-------------------|
| Vision-related function                                    | 0.669             |
| excluded 6. Reading?                                       | 0.529             |
| excluded 7. Driving at night?                              | 0.746             |
| excluded 8. Working with a computer or bank machine (ATM)? | 0.508             |
| excluded 9. Watching TV?                                   | 0.497             |

**Table S3: J-OSDI total score sensitivity and specificity analysis results**

| J-OSDI total score | Sensitivity (%) | Specificity (%) |
|--------------------|-----------------|-----------------|
| > 1.05             | 98.03           | 12.28           |
| > 2.2              | 95.39           | 14.04           |
| > 2.4              | 95.39           | 15.79           |
| > 3.35             | 94.74           | 17.54           |
| > 4.9              | 94.08           | 22.81           |
| > 5.95             | 94.08           | 26.32           |
| > 6.55             | 92.76           | 28.07           |
| > 6.95             | 91.45           | 29.82           |
| > 7.3              | 90.79           | 29.82           |
| > 7.9              | 90.13           | 31.58           |
| > 9.15             | 88.82           | 35.09           |
| > 10.2             | 88.82           | 36.84           |
| > 10.9             | 88.16           | 38.6            |
| > 11.95            | 88.16           | 40.35           |
| > 13.05            | 84.87           | 42.11           |
| > 14.1             | 84.21           | 43.86           |
| > 14.8             | 82.24           | 43.86           |
| > 15.3             | 81.58           | 45.61           |
| > 15.75            | 81.58           | 47.37           |
| > 16.3             | 80.26           | 47.37           |
| > 17.45            | 78.95           | 50.88           |
| > 18.5             | 78.29           | 52.63           |
| > 19.1             | 75.66           | 54.39           |
| > 19.7             | 75.66           | 56.14           |

|         |       |       |
|---------|-------|-------|
| > 20.25 | 74.34 | 59.65 |
| > 20.65 | 73.68 | 61.4  |
| > 21.35 | 72.37 | 61.4  |
| > 22.05 | 71.05 | 61.4  |
| > 22.35 | 70.39 | 61.4  |
| > 22.6  | 69.08 | 61.4  |
| > 23.85 | 69.08 | 63.16 |
| > 26.15 | 67.11 | 66.67 |
| > 27.4  | 67.11 | 68.42 |
| > 27.8  | 66.45 | 70.18 |
| > 28.65 | 65.79 | 70.18 |
| > 29.35 | 65.13 | 71.93 |
| > 29.75 | 61.18 | 71.93 |
| > 30.3  | 60.53 | 75.44 |
| > 30.95 | 59.87 | 75.44 |
| > 31.55 | 57.24 | 75.44 |
| > 32.55 | 55.92 | 75.44 |
| > 33.7  | 54.61 | 82.46 |
| > 34.55 | 53.95 | 84.21 |
| > 35.2  | 53.29 | 84.21 |
| > 35.75 | 52.63 | 85.96 |
| > 36.25 | 51.32 | 87.72 |
| > 36.95 | 48.68 | 87.72 |
| > 38.55 | 46.05 | 87.72 |
| > 39.8  | 44.74 | 87.72 |
| > 40.85 | 42.76 | 87.72 |
| > 42.1  | 39.47 | 91.23 |

|         |       |       |
|---------|-------|-------|
| > 42.85 | 38.82 | 91.23 |
| > 43.5  | 38.16 | 91.23 |
| > 44.4  | 36.84 | 91.23 |
| > 45.4  | 34.87 | 91.23 |
| > 46.5  | 33.55 | 91.23 |
| > 47.35 | 32.89 | 91.23 |
| > 47.6  | 32.24 | 91.23 |
| > 47.8  | 31.58 | 91.23 |
| > 48.95 | 30.92 | 92.98 |
| > 51.05 | 27.63 | 94.74 |
| > 52.2  | 26.97 | 98.25 |
| > 52.4  | 25.66 | 98.25 |
| > 53.35 | 25    | 98.25 |
| > 54.35 | 23.03 | 98.25 |
| > 55.4  | 21.71 | 98.25 |
| > 56.55 | 21.05 | 98.25 |
| > 57.15 | 20.39 | 98.25 |
| > 57.9  | 18.42 | 98.25 |
| > 58.7  | 17.11 | 98.25 |
| > 59.75 | 16.45 | 98.25 |
| > 61.45 | 15.79 | 100   |
| > 63.05 | 15.13 | 100   |
| > 63.75 | 13.82 | 100   |
| > 64.25 | 13.16 | 100   |
| > 66.05 | 11.84 | 100   |
| > 67.7  | 9.868 | 100   |
| > 68.35 | 9.211 | 100   |

|         |       |     |
|---------|-------|-----|
| > 69.65 | 8.553 | 100 |
| > 70.65 | 7.895 | 100 |
| > 71.85 | 7.237 | 100 |
| > 75    | 6.579 | 100 |
| > 77.2  | 5.921 | 100 |
| > 78.25 | 4.605 | 100 |
| > 82.1  | 3.947 | 100 |
| > 85.7  | 2.632 | 100 |
| > 87.5  | 1.974 | 100 |
| > 89.3  | 1.316 | 100 |

J-OSDI, Japanese version of the Ocular Surface Disease Index
